# Supplementary material for: Genome-Wide Comparative Gene Family Classification
Source: PLoS One. 2010 Oct 15;5(10):e13409. doi: 10.1371/journal.pone.0013409 (PMC2955529; doi:10.1371/journal.pone.0013409)
Supplement: Table S3 — Five-species TRIBE-MCL classification result of Caenorhabditis chemosensory genes. This table contains all genes found in chemosensory gene clusters (defined as TRIBE-MCL clusters that contain at least one annotated C. elegans chemosensory gene). (0.74 MB XLS) [file pone.0013409.s007.xls]

## Sheet: Sheet1
clusterid	clustersize	species	accession	geneclass
207	86	Caenorhabditis japonica	CJA04195	srg
207	86	Caenorhabditis brenneri	CBN30978
207	86	Caenorhabditis elegans	C51F7.2	srg
207	86	Caenorhabditis japonica	CJA00498	srg
207	86	Caenorhabditis briggsae	CBG25072
207	86	Caenorhabditis remanei	CRE14066
207	86	Caenorhabditis briggsae	CBG23125
207	86	Caenorhabditis briggsae	CBG00208
207	86	Caenorhabditis japonica	CJA26439
207	86	Caenorhabditis remanei	CRE04325
207	86	Caenorhabditis remanei	CRE20954
207	86	Caenorhabditis remanei	CRE30151
207	86	Caenorhabditis briggsae	CBG23120
207	86	Caenorhabditis elegans	T19C4.9	srg
207	86	Caenorhabditis briggsae	CBG18415
207	86	Caenorhabditis briggsae	CBG11299	srg
207	86	Caenorhabditis remanei	CRE08931
207	86	Caenorhabditis remanei	CRE24727
207	86	Caenorhabditis elegans	F21F8.1	srg
207	86	Caenorhabditis brenneri	CBN06853
207	86	Caenorhabditis elegans	T19C4.4	srg
207	86	Caenorhabditis remanei	CRE03380
207	86	Caenorhabditis brenneri	CBN30518
207	86	Caenorhabditis remanei	CRE30508
207	86	Caenorhabditis remanei	CRE08399
207	86	Caenorhabditis remanei	CRE00525
207	86	Caenorhabditis remanei	CRE31290
207	86	Caenorhabditis elegans	Y54G2A.38
207	86	Caenorhabditis briggsae	CBG17938
207	86	Caenorhabditis elegans	K04C1.6	srg
207	86	Caenorhabditis japonica	CJA03356	srg
207	86	Caenorhabditis remanei	CRE05509	srg
207	86	Caenorhabditis briggsae	CBG23124	srg
207	86	Caenorhabditis remanei	CRE04330
207	86	Caenorhabditis elegans	T19C4.8	srg
207	86	Caenorhabditis remanei	CRE31276
207	86	Caenorhabditis elegans	T21C9.7	srg
207	86	Caenorhabditis remanei	CRE04328
207	86	Caenorhabditis remanei	CRE04329
207	86	Caenorhabditis japonica	CJA05989
207	86	Caenorhabditis elegans	Y51A2D.12	srg
207	86	Caenorhabditis briggsae	CBG28130
207	86	Caenorhabditis remanei	CRE20893
207	86	Caenorhabditis briggsae	CBG23121
207	86	Caenorhabditis elegans	T07H8.5	srg
207	86	Caenorhabditis remanei	CRE12149
207	86	Caenorhabditis japonica	CJA02854
207	86	Caenorhabditis briggsae	CBG09649	srg
207	86	Caenorhabditis elegans	T19C4.3	srg
207	86	Caenorhabditis brenneri	CBN18876	srg
207	86	Caenorhabditis briggsae	CBG19047	srg
207	86	Caenorhabditis briggsae	CBG13904
207	86	Caenorhabditis remanei	CRE20953
207	86	Caenorhabditis brenneri	CBN23504
207	86	Caenorhabditis elegans	T19C4.2	srg
207	86	Caenorhabditis japonica	CJA08308
207	86	Caenorhabditis briggsae	CBG23681
207	86	Caenorhabditis remanei	CRE04327
207	86	Caenorhabditis briggsae	CBG23123	srg
207	86	Caenorhabditis remanei	CRE04331	srg
207	86	Caenorhabditis japonica	CJA03952	srg
207	86	Caenorhabditis briggsae	CBG27065
207	86	Caenorhabditis japonica	CJA11523
207	86	Caenorhabditis remanei	CRE27290	srg
207	86	Caenorhabditis briggsae	CBG00209	srg
207	86	Caenorhabditis remanei	CRE08517
207	86	Caenorhabditis remanei	CRE23872
207	86	Caenorhabditis brenneri	CBN10740	srg
207	86	Caenorhabditis remanei	CRE12902	srg
207	86	Caenorhabditis elegans	F31E9.2	srg
207	86	Caenorhabditis briggsae	CBG24690
207	86	Caenorhabditis brenneri	CBN19602
207	86	Caenorhabditis brenneri	CBN24990	srg
207	86	Caenorhabditis brenneri	CBN13152
207	86	Caenorhabditis remanei	CRE27625
207	86	Caenorhabditis remanei	CRE07781	srg
207	86	Caenorhabditis brenneri	CBN31783
207	86	Caenorhabditis remanei	CRE20955
207	86	Caenorhabditis remanei	CRE05862
207	86	Caenorhabditis remanei	CRE31289
207	86	Caenorhabditis elegans	K04C1.1	srg
207	86	Caenorhabditis remanei	CRE04323
207	86	Caenorhabditis briggsae	CBG12903	srg
207	86	Caenorhabditis japonica	CJA04906	srg
207	86	Caenorhabditis brenneri	CBN21580
207	86	Caenorhabditis remanei	CRE30492
1540	11	Caenorhabditis remanei	CRE11763	bmy
1540	11	Caenorhabditis elegans	F09E5.4	srg
1540	11	Caenorhabditis brenneri	CBN32536
1540	11	Caenorhabditis elegans	F09E5.17	bmy
1540	11	Caenorhabditis brenneri	CBN29226
1540	11	Caenorhabditis japonica	CJA06436	bmy
1540	11	Caenorhabditis brenneri	CBN23980	bmy
1540	11	Caenorhabditis japonica	CJA11680	srg
1540	11	Caenorhabditis briggsae	CBG02375	srg
1540	11	Caenorhabditis remanei	CRE11762	srg
1540	11	Caenorhabditis brenneri	CBN00700	srg
41	352	Caenorhabditis remanei	CRE19842
41	352	Caenorhabditis remanei	CRE24166
41	352	Caenorhabditis remanei	CRE05296
41	352	Caenorhabditis remanei	CRE20033
41	352	Caenorhabditis remanei	CRE23330
41	352	Caenorhabditis remanei	CRE22756
41	352	Caenorhabditis brenneri	CBN26005
41	352	Caenorhabditis remanei	CRE15014
41	352	Caenorhabditis remanei	CRE17272
41	352	Caenorhabditis remanei	CRE19516
41	352	Caenorhabditis brenneri	CBN17667
41	352	Caenorhabditis brenneri	CBN04170
41	352	Caenorhabditis remanei	CRE29705
41	352	Caenorhabditis remanei	CRE23124
41	352	Caenorhabditis remanei	CRE23595
41	352	Caenorhabditis remanei	CRE13823
41	352	Caenorhabditis briggsae	CBG09917
41	352	Caenorhabditis remanei	CRE13771
41	352	Caenorhabditis remanei	CRE19686
41	352	Caenorhabditis remanei	CRE05294
41	352	Caenorhabditis remanei	CRE08604
41	352	Caenorhabditis brenneri	CBN29564
41	352	Caenorhabditis remanei	CRE26884
41	352	Caenorhabditis japonica	CJA28274
41	352	Caenorhabditis remanei	CRE15817
41	352	Caenorhabditis remanei	CRE30360
41	352	Caenorhabditis remanei	CRE07169
41	352	Caenorhabditis remanei	CRE22584
41	352	Caenorhabditis brenneri	CBN07775
41	352	Caenorhabditis brenneri	CBN05103
41	352	Caenorhabditis remanei	CRE19544
41	352	Caenorhabditis briggsae	CBG15913
41	352	Caenorhabditis brenneri	CBN16704
41	352	Caenorhabditis remanei	CRE13646
41	352	Caenorhabditis brenneri	CBN31843
41	352	Caenorhabditis remanei	CRE24874
41	352	Caenorhabditis brenneri	CBN07260
41	352	Caenorhabditis remanei	CRE26640
41	352	Caenorhabditis remanei	CRE16328
41	352	Caenorhabditis brenneri	CBN10297
41	352	Caenorhabditis brenneri	CBN30253
41	352	Caenorhabditis remanei	CRE17877
41	352	Caenorhabditis remanei	CRE13943
41	352	Caenorhabditis brenneri	CBN21444
41	352	Caenorhabditis brenneri	CBN30204
41	352	Caenorhabditis remanei	CRE29294
41	352	Caenorhabditis brenneri	CBN31132
41	352	Caenorhabditis remanei	CRE21822
41	352	Caenorhabditis remanei	CRE26795
41	352	Caenorhabditis remanei	CRE11516
41	352	Caenorhabditis brenneri	CBN04456
41	352	Caenorhabditis brenneri	CBN30313
41	352	Caenorhabditis remanei	CRE24504
41	352	Caenorhabditis remanei	CRE05842
41	352	Caenorhabditis remanei	CRE19558
41	352	Caenorhabditis remanei	CRE26920
41	352	Caenorhabditis remanei	CRE08614
41	352	Caenorhabditis brenneri	CBN28271
41	352	Caenorhabditis remanei	CRE30378
41	352	Caenorhabditis remanei	CRE20506
41	352	Caenorhabditis remanei	CRE26831
41	352	Caenorhabditis brenneri	CBN13532
41	352	Caenorhabditis brenneri	CBN19489
41	352	Caenorhabditis remanei	CRE23046
41	352	Caenorhabditis remanei	CRE08364
41	352	Caenorhabditis remanei	CRE11423
41	352	Caenorhabditis brenneri	CBN30470
41	352	Caenorhabditis remanei	CRE16093
41	352	Caenorhabditis elegans	K09F6.10
41	352	Caenorhabditis brenneri	CBN20145
41	352	Caenorhabditis briggsae	CBG26664
41	352	Caenorhabditis brenneri	CBN08616
41	352	Caenorhabditis remanei	CRE21706
41	352	Caenorhabditis remanei	CRE17876
41	352	Caenorhabditis remanei	CRE20577
41	352	Caenorhabditis remanei	CRE22176
41	352	Caenorhabditis briggsae	CBG27655
41	352	Caenorhabditis remanei	CRE22704
41	352	Caenorhabditis remanei	CRE24367
41	352	Caenorhabditis remanei	CRE29480
41	352	Caenorhabditis japonica	CJA20123
41	352	Caenorhabditis remanei	CRE11235
41	352	Caenorhabditis remanei	CRE15010
41	352	Caenorhabditis remanei	CRE14312
41	352	Caenorhabditis brenneri	CBN08118
41	352	Caenorhabditis brenneri	CBN28078
41	352	Caenorhabditis brenneri	CBN26171
41	352	Caenorhabditis remanei	CRE17462
41	352	Caenorhabditis brenneri	CBN29797
41	352	Caenorhabditis remanei	CRE02697
41	352	Caenorhabditis remanei	CRE07170
41	352	Caenorhabditis remanei	CRE30377
41	352	Caenorhabditis brenneri	CBN01858
41	352	Caenorhabditis remanei	CRE29164
41	352	Caenorhabditis remanei	CRE29302
41	352	Caenorhabditis remanei	CRE29301
41	352	Caenorhabditis remanei	CRE24141
41	352	Caenorhabditis remanei	CRE21103
41	352	Caenorhabditis brenneri	CBN15996
41	352	Caenorhabditis briggsae	CBG26613
41	352	Caenorhabditis brenneri	CBN12547
41	352	Caenorhabditis remanei	CRE20581
41	352	Caenorhabditis remanei	CRE05295
41	352	Caenorhabditis remanei	CRE25833
41	352	Caenorhabditis elegans	Y57G11C.18
41	352	Caenorhabditis remanei	CRE08414
41	352	Caenorhabditis remanei	CRE31309
41	352	Caenorhabditis remanei	CRE31244
41	352	Caenorhabditis remanei	CRE16331
41	352	Caenorhabditis remanei	CRE29028
41	352	Caenorhabditis remanei	CRE23470
41	352	Caenorhabditis brenneri	CBN32259
41	352	Caenorhabditis brenneri	CBN29598
41	352	Caenorhabditis remanei	CRE19788
41	352	Caenorhabditis brenneri	CBN02614
41	352	Caenorhabditis brenneri	CBN28720
41	352	Caenorhabditis brenneri	CBN11679
41	352	Caenorhabditis remanei	CRE04260
41	352	Caenorhabditis remanei	CRE02329
41	352	Caenorhabditis remanei	CRE07650
41	352	Caenorhabditis brenneri	CBN22175
41	352	Caenorhabditis remanei	CRE13731
41	352	Caenorhabditis remanei	CRE20105
41	352	Caenorhabditis remanei	CRE20874
41	352	Caenorhabditis remanei	CRE08796
41	352	Caenorhabditis brenneri	CBN02747
41	352	Caenorhabditis remanei	CRE20052
41	352	Caenorhabditis brenneri	CBN31997
41	352	Caenorhabditis remanei	CRE07069
41	352	Caenorhabditis remanei	CRE03371
41	352	Caenorhabditis remanei	CRE15984
41	352	Caenorhabditis elegans	H09G03.1
41	352	Caenorhabditis remanei	CRE29163
41	352	Caenorhabditis brenneri	CBN07651
41	352	Caenorhabditis remanei	CRE06978
41	352	Caenorhabditis remanei	CRE24875
41	352	Caenorhabditis remanei	CRE03577
41	352	Caenorhabditis remanei	CRE10694
41	352	Caenorhabditis remanei	CRE19557
41	352	Caenorhabditis remanei	CRE24425
41	352	Caenorhabditis remanei	CRE19552
41	352	Caenorhabditis remanei	CRE20104
41	352	Caenorhabditis brenneri	CBN28947
41	352	Caenorhabditis remanei	CRE03014
41	352	Caenorhabditis japonica	CJA12582	cyp
41	352	Caenorhabditis remanei	CRE20507
41	352	Caenorhabditis remanei	CRE29293
41	352	Caenorhabditis remanei	CRE26810
41	352	Caenorhabditis brenneri	CBN31026
41	352	Caenorhabditis briggsae	CBG24106
41	352	Caenorhabditis remanei	CRE24808
41	352	Caenorhabditis brenneri	CBN09358
41	352	Caenorhabditis remanei	CRE13499
41	352	Caenorhabditis remanei	CRE05298
41	352	Caenorhabditis remanei	CRE18157
41	352	Caenorhabditis remanei	CRE23623
41	352	Caenorhabditis remanei	CRE09849
41	352	Caenorhabditis remanei	CRE04696
41	352	Caenorhabditis remanei	CRE13735
41	352	Caenorhabditis remanei	CRE26830
41	352	Caenorhabditis elegans	Y105C5A.14
41	352	Caenorhabditis briggsae	CBG09918
41	352	Caenorhabditis remanei	CRE26826
41	352	Caenorhabditis remanei	CRE24787
41	352	Caenorhabditis brenneri	CBN12813
41	352	Caenorhabditis brenneri	CBN18823
41	352	Caenorhabditis brenneri	CBN12061
41	352	Caenorhabditis remanei	CRE13138
41	352	Caenorhabditis remanei	CRE19685
41	352	Caenorhabditis brenneri	CBN29372
41	352	Caenorhabditis remanei	CRE20582
41	352	Caenorhabditis brenneri	CBN16315
41	352	Caenorhabditis remanei	CRE22768
41	352	Caenorhabditis remanei	CRE20945
41	352	Caenorhabditis remanei	CRE29300
41	352	Caenorhabditis remanei	CRE06979
41	352	Caenorhabditis remanei	CRE13734
41	352	Caenorhabditis brenneri	CBN23102
41	352	Caenorhabditis remanei	CRE15918
41	352	Caenorhabditis remanei	CRE18174
41	352	Caenorhabditis remanei	CRE29165
41	352	Caenorhabditis remanei	CRE13874
41	352	Caenorhabditis remanei	CRE21847
41	352	Caenorhabditis remanei	CRE03372
41	352	Caenorhabditis remanei	CRE28666
41	352	Caenorhabditis brenneri	CBN28679
41	352	Caenorhabditis remanei	CRE23596
41	352	Caenorhabditis brenneri	CBN31586
41	352	Caenorhabditis remanei	CRE07928
41	352	Caenorhabditis remanei	CRE21807
41	352	Caenorhabditis remanei	CRE07906
41	352	Caenorhabditis remanei	CRE02356
41	352	Caenorhabditis remanei	CRE19551
41	352	Caenorhabditis remanei	CRE12220
41	352	Caenorhabditis elegans	C25F9.2
41	352	Caenorhabditis remanei	CRE24140
41	352	Caenorhabditis brenneri	CBN11431
41	352	Caenorhabditis remanei	CRE31310
41	352	Caenorhabditis remanei	CRE08605
41	352	Caenorhabditis remanei	CRE22767
41	352	Caenorhabditis remanei	CRE13097
41	352	Caenorhabditis brenneri	CBN29388
41	352	Caenorhabditis brenneri	CBN24294
41	352	Caenorhabditis remanei	CRE03491
41	352	Caenorhabditis remanei	CRE30638
41	352	Caenorhabditis brenneri	CBN32489
41	352	Caenorhabditis brenneri	CBN30495
41	352	Caenorhabditis remanei	CRE13766
41	352	Caenorhabditis remanei	CRE14880
41	352	Caenorhabditis remanei	CRE07073
41	352	Caenorhabditis remanei	CRE21824
41	352	Caenorhabditis remanei	CRE06905
41	352	Caenorhabditis remanei	CRE15015
41	352	Caenorhabditis remanei	CRE19787
41	352	Caenorhabditis briggsae	CBG07546
41	352	Caenorhabditis remanei	CRE17622
41	352	Caenorhabditis remanei	CRE26709
41	352	Caenorhabditis brenneri	CBN10222
41	352	Caenorhabditis japonica	CJA12743
41	352	Caenorhabditis remanei	CRE23471
41	352	Caenorhabditis remanei	CRE24426
41	352	Caenorhabditis remanei	CRE15811
41	352	Caenorhabditis japonica	CJA13950
41	352	Caenorhabditis brenneri	CBN28039
41	352	Caenorhabditis brenneri	CBN28310
41	352	Caenorhabditis brenneri	CBN29457
41	352	Caenorhabditis brenneri	CBN25096
41	352	Caenorhabditis remanei	CRE22165
41	352	Caenorhabditis remanei	CRE23120
41	352	Caenorhabditis japonica	CJA24004
41	352	Caenorhabditis remanei	CRE08281
41	352	Caenorhabditis remanei	CRE09836
41	352	Caenorhabditis brenneri	CBN09934
41	352	Caenorhabditis remanei	CRE04263
41	352	Caenorhabditis remanei	CRE02362
41	352	Caenorhabditis brenneri	CBN21889
41	352	Caenorhabditis elegans	C25F9.1	srw
41	352	Caenorhabditis brenneri	CBN14542
41	352	Caenorhabditis remanei	CRE20508
41	352	Caenorhabditis remanei	CRE08466
41	352	Caenorhabditis remanei	CRE23329
41	352	Caenorhabditis brenneri	CBN10859
41	352	Caenorhabditis remanei	CRE25832
41	352	Caenorhabditis remanei	CRE06097
41	352	Caenorhabditis brenneri	CBN22926
41	352	Caenorhabditis remanei	CRE20950
41	352	Caenorhabditis remanei	CRE07891
41	352	Caenorhabditis remanei	CRE14938
41	352	Caenorhabditis remanei	CRE13238
41	352	Caenorhabditis remanei	CRE19543
41	352	Caenorhabditis remanei	CRE23558
41	352	Caenorhabditis brenneri	CBN24088
41	352	Caenorhabditis brenneri	CBN30918
41	352	Caenorhabditis brenneri	CBN32464
41	352	Caenorhabditis remanei	CRE19843
41	352	Caenorhabditis remanei	CRE07096
41	352	Caenorhabditis brenneri	CBN12305
41	352	Caenorhabditis briggsae	CBG05185
41	352	Caenorhabditis remanei	CRE19889
41	352	Caenorhabditis remanei	CRE09751
41	352	Caenorhabditis brenneri	CBN11671
41	352	Caenorhabditis brenneri	CBN15626
41	352	Caenorhabditis elegans	C23G10.5
41	352	Caenorhabditis remanei	CRE23469
41	352	Caenorhabditis remanei	CRE22583
41	352	Caenorhabditis remanei	CRE20509
41	352	Caenorhabditis remanei	CRE26915
41	352	Caenorhabditis remanei	CRE13942
41	352	Caenorhabditis remanei	CRE25864
41	352	Caenorhabditis briggsae	CBG26549
41	352	Caenorhabditis brenneri	CBN12375
41	352	Caenorhabditis brenneri	CBN12998
41	352	Caenorhabditis remanei	CRE08445
41	352	Caenorhabditis briggsae	CBG28131
41	352	Caenorhabditis remanei	CRE12221
41	352	Caenorhabditis brenneri	CBN29930
41	352	Caenorhabditis brenneri	CBN08763
41	352	Caenorhabditis briggsae	CBG18730
41	352	Caenorhabditis remanei	CRE07929
41	352	Caenorhabditis remanei	CRE16329
41	352	Caenorhabditis brenneri	CBN03796
41	352	Caenorhabditis remanei	CRE20583
41	352	Caenorhabditis remanei	CRE13137
41	352	Caenorhabditis remanei	CRE08415
41	352	Caenorhabditis brenneri	CBN31470
41	352	Caenorhabditis brenneri	CBN29557
41	352	Caenorhabditis remanei	CRE12167
41	352	Caenorhabditis brenneri	CBN28505
41	352	Caenorhabditis remanei	CRE25900
41	352	Caenorhabditis elegans	F54H12.4
41	352	Caenorhabditis remanei	CRE19485
41	352	Caenorhabditis brenneri	CBN28983
41	352	Caenorhabditis remanei	CRE15704
41	352	Caenorhabditis brenneri	CBN31463
41	352	Caenorhabditis brenneri	CBN31258
41	352	Caenorhabditis remanei	CRE08476
41	352	Caenorhabditis remanei	CRE24800
41	352	Caenorhabditis briggsae	CBG24082
41	352	Caenorhabditis briggsae	CBG22824
41	352	Caenorhabditis briggsae	CBG24597
41	352	Caenorhabditis briggsae	CBG07229
41	352	Caenorhabditis brenneri	CBN28329
41	352	Caenorhabditis remanei	CRE29706
41	352	Caenorhabditis remanei	CRE12913
41	352	Caenorhabditis remanei	CRE12953
41	352	Caenorhabditis remanei	CRE26827	taf
41	352	Caenorhabditis remanei	CRE17990
41	352	Caenorhabditis remanei	CRE19786
41	352	Caenorhabditis remanei	CRE21823
41	352	Caenorhabditis remanei	CRE22175
41	352	Caenorhabditis remanei	CRE17620
41	352	Caenorhabditis briggsae	CBG12679
41	352	Caenorhabditis remanei	CRE15810
41	352	Caenorhabditis remanei	CRE22705
41	352	Caenorhabditis remanei	CRE06906
41	352	Caenorhabditis brenneri	CBN06213
41	352	Caenorhabditis remanei	CRE20974
41	352	Caenorhabditis elegans	E01G4.5
41	352	Caenorhabditis remanei	CRE12219
41	352	Caenorhabditis remanei	CRE19841
41	352	Caenorhabditis remanei	CRE07068
41	352	Caenorhabditis remanei	CRE27744
41	352	Caenorhabditis brenneri	CBN17506
41	352	Caenorhabditis remanei	CRE13096
41	352	Caenorhabditis remanei	CRE07890
41	352	Caenorhabditis remanei	CRE23123
41	352	Caenorhabditis brenneri	CBN28034
41	352	Caenorhabditis remanei	CRE16094
41	352	Caenorhabditis remanei	CRE29707
41	352	Caenorhabditis remanei	CRE21759
41	352	Caenorhabditis remanei	CRE13136
41	352	Caenorhabditis remanei	CRE19559
41	352	Caenorhabditis remanei	CRE20614
41	352	Caenorhabditis remanei	CRE23626
41	352	Caenorhabditis remanei	CRE02800
41	352	Caenorhabditis remanei	CRE18158
41	352	Caenorhabditis remanei	CRE20584
41	352	Caenorhabditis remanei	CRE24366
41	352	Caenorhabditis brenneri	CBN08706
41	352	Caenorhabditis remanei	CRE08797
41	352	Caenorhabditis briggsae	CBG26659
41	352	Caenorhabditis remanei	CRE07095
41	352	Caenorhabditis remanei	CRE08613
41	352	Caenorhabditis brenneri	CBN20271
41	352	Caenorhabditis remanei	CRE19496
41	352	Caenorhabditis brenneri	CBN30472
41	352	Caenorhabditis remanei	CRE06977
41	352	Caenorhabditis brenneri	CBN14328
41	352	Caenorhabditis brenneri	CBN19185
41	352	Caenorhabditis briggsae	CBG19988
41	352	Caenorhabditis remanei	CRE23838
41	352	Caenorhabditis remanei	CRE22253
76	216	Caenorhabditis brenneri	CBN22335	ncx
76	216	Caenorhabditis remanei	CRE12946	srsx
76	216	Caenorhabditis elegans	T26E4.15	srsx
76	216	Caenorhabditis briggsae	CBG09529
76	216	Caenorhabditis brenneri	CBN11637
76	216	Caenorhabditis brenneri	CBN06847
76	216	Caenorhabditis remanei	CRE12889	ncx
76	216	Caenorhabditis japonica	CJA06419
76	216	Caenorhabditis brenneri	CBN00074
76	216	Caenorhabditis remanei	CRE16589
76	216	Caenorhabditis elegans	C39H7.4
76	216	Caenorhabditis elegans	Y62E10A.4	srsx
76	216	Caenorhabditis brenneri	CBN30126
76	216	Caenorhabditis elegans	T19B10.10	srsx
76	216	Caenorhabditis briggsae	CBG19907	srsx
76	216	Caenorhabditis elegans	C39H7.9	srsx
76	216	Caenorhabditis briggsae	CBG09530	srsx
76	216	Caenorhabditis remanei	CRE30967	srsx
76	216	Caenorhabditis briggsae	CBG12917	ncx
76	216	Caenorhabditis remanei	CRE14827
76	216	Caenorhabditis japonica	CJA01761	ncx
76	216	Caenorhabditis elegans	C10G8.5A	ncx
76	216	Caenorhabditis japonica	CJA18282	srsx
76	216	Caenorhabditis brenneri	CBN29283
76	216	Caenorhabditis elegans	F20E11.2	srsx
76	216	Caenorhabditis japonica	CJA23874
76	216	Caenorhabditis remanei	CRE30970	srsx
76	216	Caenorhabditis briggsae	CBG10015	ncx
76	216	Caenorhabditis elegans	Y113G7A.4A	ncx
76	216	Caenorhabditis briggsae	CBG19386	srsx
76	216	Caenorhabditis remanei	CRE27495	srsx
76	216	Caenorhabditis japonica	CJA27062	srsx
76	216	Caenorhabditis japonica	CJA18224	srsx
76	216	Caenorhabditis remanei	CRE27185	srsx
76	216	Caenorhabditis brenneri	CBN28387
76	216	Caenorhabditis japonica	CJA03293
76	216	Caenorhabditis japonica	CJA14287
76	216	Caenorhabditis elegans	C04E6.2	srsx
76	216	Caenorhabditis remanei	CRE05430	srsx
76	216	Caenorhabditis briggsae	CBG08631	srsx
76	216	Caenorhabditis brenneri	CBN03531	srsx
76	216	Caenorhabditis elegans	C51E3.3	srsx
76	216	Caenorhabditis remanei	CRE30969	srsx
76	216	Caenorhabditis elegans	C51E3.9
76	216	Caenorhabditis elegans	T22G5.4	srsx
76	216	Caenorhabditis briggsae	CBG19910
76	216	Caenorhabditis briggsae	CBG09533	srsx
76	216	Caenorhabditis briggsae	CBG09599	ncx
76	216	Caenorhabditis elegans	Y97E10B.7	ncx
76	216	Caenorhabditis elegans	Y97E10B.9	srsx
76	216	Caenorhabditis elegans	C51E3.1	srsx
76	216	Caenorhabditis brenneri	CBN23690
76	216	Caenorhabditis briggsae	CBG23150	srsx
76	216	Caenorhabditis briggsae	CBG19119	srsx
76	216	Caenorhabditis japonica	CJA08845	srsx
76	216	Caenorhabditis remanei	CRE27219	ncx
76	216	Caenorhabditis elegans	F35C12.2A	ncx
76	216	Caenorhabditis briggsae	CBG27008
76	216	Caenorhabditis elegans	F26G5.12	srsx
76	216	Caenorhabditis remanei	CRE14876
76	216	Caenorhabditis brenneri	CBN24658	srsx
76	216	Caenorhabditis briggsae	CBG03868	ncx
76	216	Caenorhabditis remanei	CRE13438	srsx
76	216	Caenorhabditis brenneri	CBN06825
76	216	Caenorhabditis elegans	Y97E10B.3	srsx
76	216	Caenorhabditis remanei	CRE15095
76	216	Caenorhabditis japonica	CJA06501
76	216	Caenorhabditis elegans	M01B2.7	srsx
76	216	Caenorhabditis briggsae	CBG19167
76	216	Caenorhabditis briggsae	CBG17641	ncx
76	216	Caenorhabditis brenneri	CBN24445	srsx
76	216	Caenorhabditis japonica	CJA04873	ncx
76	216	Caenorhabditis briggsae	CBG01786	srsx
76	216	Caenorhabditis briggsae	CBG08634
76	216	Caenorhabditis briggsae	CBG06416
76	216	Caenorhabditis japonica	CJA11479	ncx
76	216	Caenorhabditis remanei	CRE14865	srsx
76	216	Caenorhabditis briggsae	CBG18481
76	216	Caenorhabditis elegans	C13D9.6	srsx
76	216	Caenorhabditis remanei	CRE10691
76	216	Caenorhabditis japonica	CJA16897
76	216	Caenorhabditis elegans	F58D7.1	srsx
76	216	Caenorhabditis remanei	CRE03348
76	216	Caenorhabditis remanei	CRE30831	srsx
76	216	Caenorhabditis briggsae	CBG27176
76	216	Caenorhabditis japonica	CJA07911
76	216	Caenorhabditis remanei	CRE05358
76	216	Caenorhabditis brenneri	CBN14503	ncx
76	216	Caenorhabditis briggsae	CBG08632	srsx
76	216	Caenorhabditis japonica	CJA10336	ncx
76	216	Caenorhabditis remanei	CRE05516
76	216	Caenorhabditis elegans	F26G5.10	srsx
76	216	Caenorhabditis japonica	CJA29289
76	216	Caenorhabditis japonica	CJA02572	ncx
76	216	Caenorhabditis briggsae	CBG08637	ncx
76	216	Caenorhabditis remanei	CRE30830	srsx
76	216	Caenorhabditis japonica	CJA12104
76	216	Caenorhabditis elegans	C03G6.16	srsx
76	216	Caenorhabditis elegans	C39H7.8	srsx
76	216	Caenorhabditis elegans	C51E3.2	srsx
76	216	Caenorhabditis briggsae	CBG19163
76	216	Caenorhabditis japonica	CJA05559
76	216	Caenorhabditis elegans	F38E1.8	srsx
76	216	Caenorhabditis briggsae	CBG26892
76	216	Caenorhabditis japonica	CJA16303
76	216	Caenorhabditis elegans	M01B2.9	srsx
76	216	Caenorhabditis briggsae	CBG09531	srsx
76	216	Caenorhabditis briggsae	CBG06592	srsx
76	216	Caenorhabditis briggsae	CBG11453	srsx
76	216	Caenorhabditis japonica	CJA26078	srsx
76	216	Caenorhabditis elegans	ZK105.4	srsx
76	216	Caenorhabditis remanei	CRE11054	ncx
76	216	Caenorhabditis brenneri	CBN18659
76	216	Caenorhabditis briggsae	CBG08630	srsx
76	216	Caenorhabditis elegans	C51E3.4	srsx
76	216	Caenorhabditis remanei	CRE27494	srsx
76	216	Caenorhabditis brenneri	CBN22491	ncx
76	216	Caenorhabditis remanei	CRE25272	ncx
76	216	Caenorhabditis brenneri	CBN29047
76	216	Caenorhabditis japonica	CJA20416
76	216	Caenorhabditis briggsae	CBG09532	srsx
76	216	Caenorhabditis elegans	C39H7.5	srsx
76	216	Caenorhabditis elegans	F40D4.5	srsx
76	216	Caenorhabditis remanei	CRE18385
76	216	Caenorhabditis elegans	R07B5.5	srsx
76	216	Caenorhabditis japonica	CJA17957	ncx
76	216	Caenorhabditis brenneri	CBN28269
76	216	Caenorhabditis remanei	CRE13439
76	216	Caenorhabditis elegans	Y32F6B.2	ncx
76	216	Caenorhabditis japonica	CJA00050	srsx
76	216	Caenorhabditis brenneri	CBN26010
76	216	Caenorhabditis brenneri	CBN30536
76	216	Caenorhabditis briggsae	CBG10014	ncx
76	216	Caenorhabditis elegans	F20A1.3	srsx
76	216	Caenorhabditis japonica	CJA16120
76	216	Caenorhabditis remanei	CRE08265	ncx
76	216	Caenorhabditis remanei	CRE30966	srsx
76	216	Caenorhabditis japonica	CJA13569
76	216	Caenorhabditis remanei	CRE03349
76	216	Caenorhabditis brenneri	CBN18300	srsx
76	216	Caenorhabditis remanei	CRE21116	ncx
76	216	Caenorhabditis elegans	T26E4.14	srsx
76	216	Caenorhabditis remanei	CRE27496	ncx
76	216	Caenorhabditis brenneri	CBN00346
76	216	Caenorhabditis brenneri	CBN12864
76	216	Caenorhabditis elegans	F52F10.5	srsx
76	216	Caenorhabditis brenneri	CBN24225	ncx
76	216	Caenorhabditis elegans	C07A9.11	ncx
76	216	Caenorhabditis brenneri	CBN32449
76	216	Caenorhabditis elegans	C13D9.7	ncx
76	216	Caenorhabditis japonica	CJA07863
76	216	Caenorhabditis japonica	CJA27336
76	216	Caenorhabditis brenneri	CBN14724
76	216	Caenorhabditis japonica	CJA03643	ncx
76	216	Caenorhabditis remanei	CRE27186
76	216	Caenorhabditis briggsae	CBG27007
76	216	Caenorhabditis elegans	C51E3.5	srsx
76	216	Caenorhabditis briggsae	CBG21082
76	216	Caenorhabditis japonica	CJA11451
76	216	Caenorhabditis japonica	CJA29097	ncx
76	216	Caenorhabditis briggsae	CBG08636	srsx
76	216	Caenorhabditis brenneri	CBN31680
76	216	Caenorhabditis briggsae	CBG06415
76	216	Caenorhabditis briggsae	CBG09288	srsx
76	216	Caenorhabditis elegans	C13D9.8	ncx
76	216	Caenorhabditis remanei	CRE21161	srsx
76	216	Caenorhabditis japonica	CJA10697	srsx
76	216	Caenorhabditis remanei	CRE10274	srsx
76	216	Caenorhabditis brenneri	CBN28404
76	216	Caenorhabditis remanei	CRE30971
76	216	Caenorhabditis japonica	CJA05042	srsx
76	216	Caenorhabditis elegans	C07A9.4	ncx
76	216	Caenorhabditis elegans	F07B10.6	srsx
76	216	Caenorhabditis elegans	Y97E10B.4	srsx
76	216	Caenorhabditis brenneri	CBN09787
76	216	Caenorhabditis remanei	CRE18778	srsx
76	216	Caenorhabditis japonica	CJA13446	srsx
76	216	Caenorhabditis remanei	CRE25271	ncx
76	216	Caenorhabditis briggsae	CBG04744
76	216	Caenorhabditis remanei	CRE22854	srsx
76	216	Caenorhabditis japonica	CJA08061	srsx
76	216	Caenorhabditis briggsae	CBG08628	srsx
76	216	Caenorhabditis briggsae	CBG09287	srsx
76	216	Caenorhabditis remanei	CRE13437	srsx
76	216	Caenorhabditis brenneri	CBN16418	ncx
76	216	Caenorhabditis remanei	CRE27187	ncx
76	216	Caenorhabditis briggsae	CBG23149	srsx
76	216	Caenorhabditis remanei	CRE16546
76	216	Caenorhabditis briggsae	CBG06769	ncx
76	216	Caenorhabditis remanei	CRE30968	srsx
76	216	Caenorhabditis japonica	CJA24999	srsx
76	216	Caenorhabditis brenneri	CBN18076
76	216	Caenorhabditis brenneri	CBN06572	srsx
76	216	Caenorhabditis brenneri	CBN04518
76	216	Caenorhabditis elegans	ZC168.1	ncx
76	216	Caenorhabditis elegans	Y97E10B.2	srsx
76	216	Caenorhabditis japonica	CJA12945	ncx
76	216	Caenorhabditis brenneri	CBN11377
76	216	Caenorhabditis elegans	C13D9.4	srsx
76	216	Caenorhabditis brenneri	CBN23941
76	216	Caenorhabditis brenneri	CBN17450
76	216	Caenorhabditis briggsae	CBG05622	srsx
76	216	Caenorhabditis brenneri	CBN21382	ncx
76	216	Caenorhabditis remanei	CRE02745
76	216	Caenorhabditis brenneri	CBN31610
76	216	Caenorhabditis brenneri	CBN09679
76	216	Caenorhabditis elegans	F53F8.2	srsx
76	216	Caenorhabditis briggsae	CBG19909	srsx
76	216	Caenorhabditis briggsae	CBG08629	ncx
76	216	Caenorhabditis brenneri	CBN02860
76	216	Caenorhabditis brenneri	CBN07307
76	216	Caenorhabditis elegans	C13D9.5	srsx
76	216	Caenorhabditis japonica	CJA06478
76	216	Caenorhabditis japonica	CJA12533
76	216	Caenorhabditis brenneri	CBN07043
76	216	Caenorhabditis briggsae	CBG08638
5858	4	Caenorhabditis elegans	C25F9.11
5858	4	Caenorhabditis elegans	C25F9.12
5858	4	Caenorhabditis elegans	C25F9.6
5858	4	Caenorhabditis elegans	C25F9.7	srw
215	83	Caenorhabditis japonica	CJA26255
215	83	Caenorhabditis briggsae	CBG23713
215	83	Caenorhabditis remanei	CRE25096
215	83	Caenorhabditis brenneri	CBN13703
215	83	Caenorhabditis briggsae	CBG02338	srb
215	83	Caenorhabditis japonica	CJA07361
215	83	Caenorhabditis remanei	CRE03036
215	83	Caenorhabditis briggsae	CBG02335	srb
215	83	Caenorhabditis brenneri	CBN15389	srb
215	83	Caenorhabditis brenneri	CBN08920	srb
215	83	Caenorhabditis elegans	F37C12.17	srb
215	83	Caenorhabditis elegans	F58A6.6	srb
215	83	Caenorhabditis brenneri	CBN30344
215	83	Caenorhabditis remanei	CRE11912
215	83	Caenorhabditis briggsae	CBG02336	srb
215	83	Caenorhabditis remanei	CRE11911	srb
215	83	Caenorhabditis brenneri	CBN31367
215	83	Caenorhabditis remanei	CRE11917	srb
215	83	Caenorhabditis remanei	CRE23743	srb
215	83	Caenorhabditis remanei	CRE25097
215	83	Caenorhabditis brenneri	CBN24031	srb
215	83	Caenorhabditis japonica	CJA00681	srb
215	83	Caenorhabditis elegans	F23F12.10	srb
215	83	Caenorhabditis elegans	C54F6.11	srb
215	83	Caenorhabditis japonica	CJA00923
215	83	Caenorhabditis elegans	R05H5.6	srb
215	83	Caenorhabditis briggsae	CBG00809	srb
215	83	Caenorhabditis elegans	F01D4.7	srb
215	83	Caenorhabditis remanei	CRE02902
215	83	Caenorhabditis elegans	F37C12.15	srb
215	83	Caenorhabditis elegans	F37C12.16	srb
215	83	Caenorhabditis remanei	CRE11915
215	83	Caenorhabditis remanei	CRE16123
215	83	Caenorhabditis remanei	CRE25098
215	83	Caenorhabditis briggsae	CBG20969
215	83	Caenorhabditis brenneri	CBN03530
215	83	Caenorhabditis elegans	C27D6.9	srb
215	83	Caenorhabditis briggsae	CBG08385	srb
215	83	Caenorhabditis remanei	CRE02900
215	83	Caenorhabditis japonica	CJA06090
215	83	Caenorhabditis brenneri	CBN14864	srb
215	83	Caenorhabditis remanei	CRE16115
215	83	Caenorhabditis remanei	CRE11910	srb
215	83	Caenorhabditis elegans	C27D6.10	srb
215	83	Caenorhabditis remanei	CRE06446
215	83	Caenorhabditis remanei	CRE02901
215	83	Caenorhabditis elegans	C27D6.8	srb
215	83	Caenorhabditis japonica	CJA15287	srb
215	83	Caenorhabditis brenneri	CBN07398
215	83	Caenorhabditis remanei	CRE11916	srb
215	83	Caenorhabditis briggsae	CBG02340	srb
215	83	Caenorhabditis japonica	CJA06323
215	83	Caenorhabditis remanei	CRE10918	srb
215	83	Caenorhabditis briggsae	CBG21146	srb
215	83	Caenorhabditis brenneri	CBN17765	srb
215	83	Caenorhabditis briggsae	CBG00892
215	83	Caenorhabditis elegans	F58A6.10	srb
215	83	Caenorhabditis remanei	CRE03117
215	83	Caenorhabditis elegans	C27D6.6	srb
215	83	Caenorhabditis japonica	CJA01000	srb
215	83	Caenorhabditis remanei	CRE05788	srb
215	83	Caenorhabditis briggsae	CBG23710
215	83	Caenorhabditis brenneri	CBN32195
215	83	Caenorhabditis briggsae	CBG02342	srb
215	83	Caenorhabditis brenneri	CBN03369	srb
215	83	Caenorhabditis japonica	CJA10240	srb
215	83	Caenorhabditis brenneri	CBN01992
215	83	Caenorhabditis remanei	CRE05576	srb
215	83	Caenorhabditis briggsae	CBG00807	srb
215	83	Caenorhabditis brenneri	CBN02042
215	83	Caenorhabditis briggsae	CBG12736
215	83	Caenorhabditis elegans	C54F6.7	srb
215	83	Caenorhabditis elegans	C48B6.5	srb
215	83	Caenorhabditis briggsae	CBG08353
215	83	Caenorhabditis elegans	F58A6.11	srb
215	83	Caenorhabditis remanei	CRE03118
215	83	Caenorhabditis japonica	CJA03825
215	83	Caenorhabditis remanei	CRE11914	srb
215	83	Caenorhabditis brenneri	CBN20735	srb
215	83	Caenorhabditis briggsae	CBG14450
215	83	Caenorhabditis japonica	CJA17275
215	83	Caenorhabditis briggsae	CBG02339	srb
215	83	Caenorhabditis remanei	CRE11913	srb
154	113	Caenorhabditis brenneri	CBN00005
154	113	Caenorhabditis remanei	CRE26257	sra
154	113	Caenorhabditis japonica	CJA09808	sra
154	113	Caenorhabditis remanei	CRE26522	sra
154	113	Caenorhabditis remanei	CRE26244	sra
154	113	Caenorhabditis briggsae	CBG20639	sra
154	113	Caenorhabditis elegans	F18C5.1	sra
154	113	Caenorhabditis elegans	T26E3.9	sra
154	113	Caenorhabditis remanei	CRE09828	sra
154	113	Caenorhabditis brenneri	CBN00957
154	113	Caenorhabditis elegans	B0304.6	sra
154	113	Caenorhabditis remanei	CRE20886
154	113	Caenorhabditis elegans	AH6.10	sra
154	113	Caenorhabditis japonica	CJA25710	sra
154	113	Caenorhabditis briggsae	CBG08892
154	113	Caenorhabditis elegans	F28C12.5	sra
154	113	Caenorhabditis brenneri	CBN13763	sra
154	113	Caenorhabditis elegans	F28C12.2	sra
154	113	Caenorhabditis brenneri	CBN13656
154	113	Caenorhabditis brenneri	CBN00116	sra
154	113	Caenorhabditis remanei	CRE12132
154	113	Caenorhabditis elegans	C56C10.5	sra
154	113	Caenorhabditis briggsae	CBG00844
154	113	Caenorhabditis elegans	F28C12.4	sra
154	113	Caenorhabditis briggsae	CBG13454	sra
154	113	Caenorhabditis briggsae	CBG13479	sra
154	113	Caenorhabditis remanei	CRE09829
154	113	Caenorhabditis elegans	AH6.8	sra
154	113	Caenorhabditis elegans	F35C5.2	sra
154	113	Caenorhabditis japonica	CJA00059	sra
154	113	Caenorhabditis remanei	CRE11862	sra
154	113	Caenorhabditis brenneri	CBN18505
154	113	Caenorhabditis brenneri	CBN23544
154	113	Caenorhabditis brenneri	CBN18643
154	113	Caenorhabditis briggsae	CBG00681	sra
154	113	Caenorhabditis briggsae	CBG04330	sra
154	113	Caenorhabditis briggsae	CBG13758	sra
154	113	Caenorhabditis japonica	CJA18805	sra
154	113	Caenorhabditis elegans	F28C12.7	sra
154	113	Caenorhabditis remanei	CRE01588	sra
154	113	Caenorhabditis japonica	CJA18462	sra
154	113	Caenorhabditis briggsae	CBG18723	sra
154	113	Caenorhabditis briggsae	CBG13478	sra
154	113	Caenorhabditis japonica	CJA06850	sra
154	113	Caenorhabditis briggsae	CBG04323	sra
154	113	Caenorhabditis brenneri	CBN30477
154	113	Caenorhabditis elegans	AH6.7	sra
154	113	Caenorhabditis japonica	CJA12389
154	113	Caenorhabditis elegans	F44F4.13	sra
154	113	Caenorhabditis elegans	Y40H7A.6	sra
154	113	Caenorhabditis briggsae	CBG13457
154	113	Caenorhabditis remanei	CRE12052
154	113	Caenorhabditis brenneri	CBN29071
154	113	Caenorhabditis japonica	CJA20789
154	113	Caenorhabditis briggsae	CBG13455	sra
154	113	Caenorhabditis briggsae	CBG04324	sra
154	113	Caenorhabditis briggsae	CBG20644	sra
154	113	Caenorhabditis remanei	CRE11861	sra
154	113	Caenorhabditis remanei	CRE12135	sra
154	113	Caenorhabditis brenneri	CBN31666
154	113	Caenorhabditis elegans	B0304.8	sra
154	113	Caenorhabditis remanei	CRE12134
154	113	Caenorhabditis elegans	F49E12.5A	sra
154	113	Caenorhabditis brenneri	CBN24771
154	113	Caenorhabditis remanei	CRE12122	sra
154	113	Caenorhabditis elegans	AH6.14	sra
154	113	Caenorhabditis elegans	AH6.6	sra
154	113	Caenorhabditis japonica	CJA15643
154	113	Caenorhabditis brenneri	CBN13110
154	113	Caenorhabditis remanei	CRE12133
154	113	Caenorhabditis remanei	CRE03082
154	113	Caenorhabditis briggsae	CBG13456	sra
154	113	Caenorhabditis elegans	F18C5.6	sra
154	113	Caenorhabditis brenneri	CBN10269
154	113	Caenorhabditis remanei	CRE12131
154	113	Caenorhabditis elegans	T06G6.1	sra
154	113	Caenorhabditis remanei	CRE09050	sra
154	113	Caenorhabditis briggsae	CBG26660
154	113	Caenorhabditis remanei	CRE09827	sra
154	113	Caenorhabditis briggsae	CBG18722	sra
154	113	Caenorhabditis briggsae	CBG18721	sra
154	113	Caenorhabditis japonica	CJA07847
154	113	Caenorhabditis remanei	CRE11859	sra
154	113	Caenorhabditis elegans	F18C5.8	sra
154	113	Caenorhabditis elegans	AH6.11	sra
154	113	Caenorhabditis elegans	AH6.12	sra
154	113	Caenorhabditis japonica	CJA08866
154	113	Caenorhabditis elegans	B0304.5	sra
154	113	Caenorhabditis elegans	B0304.7	sra
154	113	Caenorhabditis elegans	AH6.4	sra
154	113	Caenorhabditis remanei	CRE09830
154	113	Caenorhabditis brenneri	CBN13961
154	113	Caenorhabditis elegans	F44F4.5A	sra
154	113	Caenorhabditis elegans	B0304.9	sra
154	113	Caenorhabditis japonica	CJA00854
154	113	Caenorhabditis remanei	CRE16942	sra
154	113	Caenorhabditis elegans	T19D12.8	sra
154	113	Caenorhabditis japonica	CJA13519	sra
154	113	Caenorhabditis brenneri	CBN16165	sra
154	113	Caenorhabditis briggsae	CBG18403	sra
154	113	Caenorhabditis remanei	CRE17295	sra
154	113	Caenorhabditis brenneri	CBN31663
154	113	Caenorhabditis brenneri	CBN14485	sra
154	113	Caenorhabditis brenneri	CBN07042
154	113	Caenorhabditis briggsae	CBG20641	sra
154	113	Caenorhabditis elegans	T06G6.2	sra
154	113	Caenorhabditis remanei	CRE17296	sra
154	113	Caenorhabditis brenneri	CBN26415
154	113	Caenorhabditis brenneri	CBN11023	sra
154	113	Caenorhabditis elegans	F28C12.1	sra
154	113	Caenorhabditis remanei	CRE12130
154	113	Caenorhabditis brenneri	CBN25319	sra
154	113	Caenorhabditis remanei	CRE26258
72	228	Caenorhabditis remanei	CRE02461
72	228	Caenorhabditis elegans	C31A11.3	srbc
72	228	Caenorhabditis brenneri	CBN10972
72	228	Caenorhabditis elegans	R13D11.1
72	228	Caenorhabditis elegans	F16B4.10	srbc
72	228	Caenorhabditis remanei	CRE09511
72	228	Caenorhabditis remanei	CRE08778
72	228	Caenorhabditis brenneri	CBN20728
72	228	Caenorhabditis elegans	F54B8.11	srbc
72	228	Caenorhabditis briggsae	CBG21841
72	228	Caenorhabditis elegans	C45H4.9	srbc
72	228	Caenorhabditis briggsae	CBG21843
72	228	Caenorhabditis elegans	C36C5.3	srbc
72	228	Caenorhabditis elegans	F54B8.7A	srbc
72	228	Caenorhabditis briggsae	CBG24412
72	228	Caenorhabditis briggsae	CBG20966
72	228	Caenorhabditis elegans	R13D11.3
72	228	Caenorhabditis elegans	F40D4.7	srbc
72	228	Caenorhabditis remanei	CRE02463
72	228	Caenorhabditis remanei	CRE08775
72	228	Caenorhabditis brenneri	CBN00539
72	228	Caenorhabditis elegans	Y57A10C.7
72	228	Caenorhabditis japonica	CJA00711
72	228	Caenorhabditis elegans	Y57A10C.8
72	228	Caenorhabditis elegans	ZC455.11	srbc
72	228	Caenorhabditis elegans	R09E12.2	srbc
72	228	Caenorhabditis briggsae	CBG21804	srbc
72	228	Caenorhabditis brenneri	CBN32305
72	228	Caenorhabditis brenneri	CBN26024	srbc
72	228	Caenorhabditis brenneri	CBN21389
72	228	Caenorhabditis remanei	CRE18997
72	228	Caenorhabditis briggsae	CBG27009
72	228	Caenorhabditis brenneri	CBN03955
72	228	Caenorhabditis elegans	R09E12.8	srbc
72	228	Caenorhabditis remanei	CRE18994
72	228	Caenorhabditis brenneri	CBN07900
72	228	Caenorhabditis remanei	CRE19014
72	228	Caenorhabditis brenneri	CBN31169
72	228	Caenorhabditis briggsae	CBG21855
72	228	Caenorhabditis brenneri	CBN15240	srbc
72	228	Caenorhabditis brenneri	CBN30391
72	228	Caenorhabditis brenneri	CBN31311
72	228	Caenorhabditis brenneri	CBN16111
72	228	Caenorhabditis elegans	K09C6.4	srbc
72	228	Caenorhabditis brenneri	CBN18697
72	228	Caenorhabditis elegans	C02A12.5	srbc
72	228	Caenorhabditis remanei	CRE19004
72	228	Caenorhabditis briggsae	CBG01293
72	228	Caenorhabditis brenneri	CBN29237
72	228	Caenorhabditis brenneri	CBN15750
72	228	Caenorhabditis japonica	CJA17702
72	228	Caenorhabditis remanei	CRE02506
72	228	Caenorhabditis elegans	T05G11.2	srbc
72	228	Caenorhabditis briggsae	CBG06336	srbc
72	228	Caenorhabditis briggsae	CBG21847
72	228	Caenorhabditis briggsae	CBG20967
72	228	Caenorhabditis brenneri	CBN11834
72	228	Caenorhabditis elegans	F54B8.9	srbc
72	228	Caenorhabditis elegans	C18B10.3	srbc
72	228	Caenorhabditis briggsae	CBG06473
72	228	Caenorhabditis japonica	CJA05441
72	228	Caenorhabditis brenneri	CBN16273
72	228	Caenorhabditis japonica	CJA15411
72	228	Caenorhabditis briggsae	CBG18659
72	228	Caenorhabditis briggsae	CBG08595	srbc
72	228	Caenorhabditis remanei	CRE19003	srbc
72	228	Caenorhabditis elegans	C45H4.11	srbc
72	228	Caenorhabditis remanei	CRE09451
72	228	Caenorhabditis remanei	CRE13129
72	228	Caenorhabditis briggsae	CBG01292
72	228	Caenorhabditis elegans	C18B10.4	srbc
72	228	Caenorhabditis elegans	C31A11.4	srbc
72	228	Caenorhabditis remanei	CRE13043
72	228	Caenorhabditis elegans	F54B8.6	srbc
72	228	Caenorhabditis elegans	Y19D10A.17
72	228	Caenorhabditis remanei	CRE06447
72	228	Caenorhabditis japonica	CJA15036
72	228	Caenorhabditis briggsae	CBG06472
72	228	Caenorhabditis briggsae	CBG06329
72	228	Caenorhabditis brenneri	CBN18193
72	228	Caenorhabditis briggsae	CBG08592	srbc
72	228	Caenorhabditis brenneri	CBN14272
72	228	Caenorhabditis elegans	F30B5.6	srbc
72	228	Caenorhabditis briggsae	CBG06606
72	228	Caenorhabditis brenneri	CBN18579
72	228	Caenorhabditis brenneri	CBN23822	srbc
72	228	Caenorhabditis remanei	CRE19005
72	228	Caenorhabditis briggsae	CBG10512
72	228	Caenorhabditis elegans	C45H4.6	srbc
72	228	Caenorhabditis elegans	C02A12.3	srbc
72	228	Caenorhabditis briggsae	CBG01289
72	228	Caenorhabditis brenneri	CBN19742	srbc
72	228	Caenorhabditis elegans	F41H8.1
72	228	Caenorhabditis remanei	CRE27165
72	228	Caenorhabditis elegans	T05E12.2	srbc
72	228	Caenorhabditis briggsae	CBG21842
72	228	Caenorhabditis brenneri	CBN11146
72	228	Caenorhabditis brenneri	CBN21465
72	228	Caenorhabditis briggsae	CBG19192
72	228	Caenorhabditis elegans	Y49C4A.2	srbc
72	228	Caenorhabditis remanei	CRE19338
72	228	Caenorhabditis elegans	F54B8.8	srbc
72	228	Caenorhabditis japonica	CJA15837
72	228	Caenorhabditis elegans	T19C9.1	srbc
72	228	Caenorhabditis brenneri	CBN19593
72	228	Caenorhabditis elegans	K09C6.6
72	228	Caenorhabditis brenneri	CBN23623
72	228	Caenorhabditis elegans	M01B2.3	srbc
72	228	Caenorhabditis elegans	C02A12.6	srbc
72	228	Caenorhabditis elegans	Y57A10C.10
72	228	Caenorhabditis brenneri	CBN19020
72	228	Caenorhabditis elegans	H24O09.1	srbc
72	228	Caenorhabditis remanei	CRE08774
72	228	Caenorhabditis remanei	CRE02528
72	228	Caenorhabditis elegans	C18B10.1	srbc
72	228	Caenorhabditis brenneri	CBN11890
72	228	Caenorhabditis elegans	C45H4.3	srbc
72	228	Caenorhabditis remanei	CRE19010
72	228	Caenorhabditis briggsae	CBG01296
72	228	Caenorhabditis briggsae	CBG01349
72	228	Caenorhabditis elegans	ZC455.9	srbc
72	228	Caenorhabditis elegans	T24A6.13	srbc
72	228	Caenorhabditis elegans	C45H4.1	srbc
72	228	Caenorhabditis elegans	B0250.6	srbc
72	228	Caenorhabditis briggsae	CBG06604
72	228	Caenorhabditis remanei	CRE06448
72	228	Caenorhabditis elegans	C45H4.8	srbc
72	228	Caenorhabditis elegans	F35F10.9	srbc
72	228	Caenorhabditis brenneri	CBN12146
72	228	Caenorhabditis brenneri	CBN29793
72	228	Caenorhabditis briggsae	CBG24410
72	228	Caenorhabditis elegans	Y5H2B.4	srbc
72	228	Caenorhabditis remanei	CRE02507
72	228	Caenorhabditis elegans	K09C6.10
72	228	Caenorhabditis briggsae	CBG21838	srbc
72	228	Caenorhabditis brenneri	CBN22930
72	228	Caenorhabditis briggsae	CBG21846
72	228	Caenorhabditis elegans	C45H4.16	srbc
72	228	Caenorhabditis elegans	R09E12.1	srbc
72	228	Caenorhabditis elegans	F54B8.16	srbc
72	228	Caenorhabditis elegans	C02A12.9	srbc
72	228	Caenorhabditis elegans	F10A3.16
72	228	Caenorhabditis briggsae	CBG06603
72	228	Caenorhabditis elegans	K09C6.5	srbc
72	228	Caenorhabditis elegans	T24A6.10	srbc
72	228	Caenorhabditis remanei	CRE18996
72	228	Caenorhabditis remanei	CRE19002	srbc
72	228	Caenorhabditis elegans	C30G7.5
72	228	Caenorhabditis brenneri	CBN22108
72	228	Caenorhabditis elegans	F54B8.12	srbc
72	228	Caenorhabditis brenneri	CBN05439	srbc
72	228	Caenorhabditis briggsae	CBG01294
72	228	Caenorhabditis elegans	C18B10.2	srbc
72	228	Caenorhabditis briggsae	CBG06339
72	228	Caenorhabditis briggsae	CBG06330
72	228	Caenorhabditis japonica	CJA14616	srbc
72	228	Caenorhabditis elegans	C45H4.10	srbc
72	228	Caenorhabditis elegans	Y32B12B.3	srbc
72	228	Caenorhabditis elegans	T24A6.5	srbc
72	228	Caenorhabditis elegans	M02H5.12	srbc
72	228	Caenorhabditis elegans	ZC455.8A	srbc
72	228	Caenorhabditis remanei	CRE18681	srbc
72	228	Caenorhabditis remanei	CRE08776
72	228	Caenorhabditis remanei	CRE27166
72	228	Caenorhabditis elegans	C31A11.10	srbc
72	228	Caenorhabditis briggsae	CBG21840
72	228	Caenorhabditis briggsae	CBG06613	srbc
72	228	Caenorhabditis remanei	CRE19008
72	228	Caenorhabditis elegans	F30B5.8	srbc
72	228	Caenorhabditis brenneri	CBN20699
72	228	Caenorhabditis elegans	Y113G7B.9	srbc
72	228	Caenorhabditis remanei	CRE13134
72	228	Caenorhabditis elegans	C18B10.5	srbc
72	228	Caenorhabditis briggsae	CBG06338
72	228	Caenorhabditis briggsae	CBG01295
72	228	Caenorhabditis elegans	C04E12.9	srbc
72	228	Caenorhabditis brenneri	CBN00443
72	228	Caenorhabditis remanei	CRE27475
72	228	Caenorhabditis brenneri	CBN03382
72	228	Caenorhabditis elegans	Y45G12C.8	srbc
72	228	Caenorhabditis brenneri	CBN05347
72	228	Caenorhabditis elegans	T28A11.7	srbc
72	228	Caenorhabditis elegans	C02A12.10	srbc
72	228	Caenorhabditis brenneri	CBN19296
72	228	Caenorhabditis japonica	CJA07038
72	228	Caenorhabditis elegans	C02A12.2	srbc
72	228	Caenorhabditis brenneri	CBN08028
72	228	Caenorhabditis elegans	F38H12.5
72	228	Caenorhabditis elegans	M01B2.4	srbc
72	228	Caenorhabditis brenneri	CBN07148
72	228	Caenorhabditis elegans	Y57A10C.9
72	228	Caenorhabditis brenneri	CBN04498
72	228	Caenorhabditis remanei	CRE27164
72	228	Caenorhabditis remanei	CRE18429	srbc
72	228	Caenorhabditis briggsae	CBG26979
72	228	Caenorhabditis elegans	C45H4.7	srbc
72	228	Caenorhabditis brenneri	CBN16298
72	228	Caenorhabditis remanei	CRE19007
72	228	Caenorhabditis japonica	CJA07711
72	228	Caenorhabditis remanei	CRE08777
72	228	Caenorhabditis elegans	F20E11.15	srbc
72	228	Caenorhabditis elegans	Y39G10AR.22	srbc
72	228	Caenorhabditis remanei	CRE18995
72	228	Caenorhabditis remanei	CRE31609
72	228	Caenorhabditis elegans	Y49C4A.3	srbc
72	228	Caenorhabditis elegans	B0250.10	srbc
72	228	Caenorhabditis elegans	T06E6.11	srbc
72	228	Caenorhabditis briggsae	CBG21839
72	228	Caenorhabditis elegans	W05H5.1
72	228	Caenorhabditis brenneri	CBN20495
72	228	Caenorhabditis brenneri	CBN14995
72	228	Caenorhabditis briggsae	CBG27344
72	228	Caenorhabditis elegans	F54B8.10	srbc
72	228	Caenorhabditis elegans	F08E10.2	srbc
72	228	Caenorhabditis elegans	F41H8.2
72	228	Caenorhabditis brenneri	CBN22706
72	228	Caenorhabditis remanei	CRE02462
72	228	Caenorhabditis briggsae	CBG26936
72	228	Caenorhabditis japonica	CJA12145
72	228	Caenorhabditis remanei	CRE02540
72	228	Caenorhabditis elegans	F40D4.6	srbc
72	228	Caenorhabditis brenneri	CBN25394
72	228	Caenorhabditis briggsae	CBG01291
72	228	Caenorhabditis remanei	CRE09035
72	228	Caenorhabditis elegans	F35F10.2	srbc
72	228	Caenorhabditis elegans	F15E11.10	srbc
72	228	Caenorhabditis japonica	CJA01268
72	228	Caenorhabditis elegans	Y49C4A.1	srbc
2	1226	Caenorhabditis remanei	CRE20894
2	1226	Caenorhabditis japonica	CJA10087
2	1226	Caenorhabditis japonica	CJA24670
2	1226	Caenorhabditis japonica	CJA21703
2	1226	Caenorhabditis brenneri	CBN05025
2	1226	Caenorhabditis remanei	CRE05388
2	1226	Caenorhabditis japonica	CJA16320
2	1226	Caenorhabditis remanei	CRE10610
2	1226	Caenorhabditis remanei	CRE19587
2	1226	Caenorhabditis japonica	CJA23256
2	1226	Caenorhabditis japonica	CJA01449
2	1226	Caenorhabditis japonica	CJA19166
2	1226	Caenorhabditis remanei	CRE28053
2	1226	Caenorhabditis japonica	CJA13193
2	1226	Caenorhabditis japonica	CJA21219
2	1226	Caenorhabditis japonica	CJA04065
2	1226	Caenorhabditis remanei	CRE30045
2	1226	Caenorhabditis japonica	CJA15137
2	1226	Caenorhabditis remanei	CRE11299
2	1226	Caenorhabditis japonica	CJA07900
2	1226	Caenorhabditis brenneri	CBN19315
2	1226	Caenorhabditis japonica	CJA02929
2	1226	Caenorhabditis remanei	CRE04526
2	1226	Caenorhabditis japonica	CJA12415
2	1226	Caenorhabditis japonica	CJA24368
2	1226	Caenorhabditis japonica	CJA04050
2	1226	Caenorhabditis japonica	CJA17708
2	1226	Caenorhabditis japonica	CJA11364
2	1226	Caenorhabditis remanei	CRE20617
2	1226	Caenorhabditis briggsae	CBG06741
2	1226	Caenorhabditis japonica	CJA20778
2	1226	Caenorhabditis japonica	CJA24586
2	1226	Caenorhabditis japonica	CJA07505
2	1226	Caenorhabditis japonica	CJA14156
2	1226	Caenorhabditis remanei	CRE18500
2	1226	Caenorhabditis japonica	CJA12805
2	1226	Caenorhabditis japonica	CJA25505
2	1226	Caenorhabditis japonica	CJA20881
2	1226	Caenorhabditis remanei	CRE30193
2	1226	Caenorhabditis japonica	CJA13649
2	1226	Caenorhabditis remanei	CRE17529
2	1226	Caenorhabditis remanei	CRE00134
2	1226	Caenorhabditis japonica	CJA19888
2	1226	Caenorhabditis remanei	CRE30138
2	1226	Caenorhabditis japonica	CJA05409
2	1226	Caenorhabditis japonica	CJA00121
2	1226	Caenorhabditis japonica	CJA28071
2	1226	Caenorhabditis japonica	CJA03404
2	1226	Caenorhabditis remanei	CRE30333
2	1226	Caenorhabditis elegans	E03H4.4
2	1226	Caenorhabditis remanei	CRE09905
2	1226	Caenorhabditis japonica	CJA04932
2	1226	Caenorhabditis remanei	CRE17670
2	1226	Caenorhabditis japonica	CJA17513
2	1226	Caenorhabditis remanei	CRE02699
2	1226	Caenorhabditis remanei	CRE04433
2	1226	Caenorhabditis remanei	CRE25505
2	1226	Caenorhabditis japonica	CJA24643
2	1226	Caenorhabditis remanei	CRE07824
2	1226	Caenorhabditis remanei	CRE13753
2	1226	Caenorhabditis remanei	CRE14883
2	1226	Caenorhabditis remanei	CRE03402
2	1226	Caenorhabditis japonica	CJA02481
2	1226	Caenorhabditis japonica	CJA05619
2	1226	Caenorhabditis japonica	CJA05601
2	1226	Caenorhabditis brenneri	CBN15029
2	1226	Caenorhabditis japonica	CJA28710
2	1226	Caenorhabditis remanei	CRE19951
2	1226	Caenorhabditis remanei	CRE09706
2	1226	Caenorhabditis japonica	CJA08706
2	1226	Caenorhabditis remanei	CRE23171
2	1226	Caenorhabditis remanei	CRE24179
2	1226	Caenorhabditis remanei	CRE07215
2	1226	Caenorhabditis japonica	CJA25438
2	1226	Caenorhabditis japonica	CJA22214
2	1226	Caenorhabditis remanei	CRE26666
2	1226	Caenorhabditis japonica	CJA03154
2	1226	Caenorhabditis japonica	CJA00600	hen
2	1226	Caenorhabditis briggsae	CBG19185
2	1226	Caenorhabditis japonica	CJA28195
2	1226	Caenorhabditis remanei	CRE15077
2	1226	Caenorhabditis japonica	CJA28880
2	1226	Caenorhabditis japonica	CJA28096
2	1226	Caenorhabditis remanei	CRE13988
2	1226	Caenorhabditis remanei	CRE31599
2	1226	Caenorhabditis remanei	CRE08055
2	1226	Caenorhabditis japonica	CJA25713
2	1226	Caenorhabditis japonica	CJA07006
2	1226	Caenorhabditis japonica	CJA29310
2	1226	Caenorhabditis japonica	CJA28541
2	1226	Caenorhabditis japonica	CJA25237
2	1226	Caenorhabditis briggsae	CBG01192
2	1226	Caenorhabditis remanei	CRE14112
2	1226	Caenorhabditis briggsae	CBG16680	hsp
2	1226	Caenorhabditis briggsae	CBG09876
2	1226	Caenorhabditis japonica	CJA09097
2	1226	Caenorhabditis remanei	CRE07076
2	1226	Caenorhabditis japonica	CJA25784
2	1226	Caenorhabditis japonica	CJA21857
2	1226	Caenorhabditis remanei	CRE29158
2	1226	Caenorhabditis japonica	CJA19499
2	1226	Caenorhabditis briggsae	CBG08149
2	1226	Caenorhabditis japonica	CJA00150
2	1226	Caenorhabditis remanei	CRE05085
2	1226	Caenorhabditis briggsae	CBG13846
2	1226	Caenorhabditis remanei	CRE02810
2	1226	Caenorhabditis japonica	CJA21447
2	1226	Caenorhabditis japonica	CJA01851
2	1226	Caenorhabditis japonica	CJA21305
2	1226	Caenorhabditis japonica	CJA09895
2	1226	Caenorhabditis japonica	CJA12081
2	1226	Caenorhabditis japonica	CJA21508
2	1226	Caenorhabditis japonica	CJA19675
2	1226	Caenorhabditis remanei	CRE19860
2	1226	Caenorhabditis japonica	CJA26591
2	1226	Caenorhabditis remanei	CRE02700
2	1226	Caenorhabditis japonica	CJA03547
2	1226	Caenorhabditis remanei	CRE24498
2	1226	Caenorhabditis japonica	CJA17885
2	1226	Caenorhabditis japonica	CJA28006
2	1226	Caenorhabditis japonica	CJA27366
2	1226	Caenorhabditis japonica	CJA26873
2	1226	Caenorhabditis japonica	CJA01849
2	1226	Caenorhabditis japonica	CJA08026
2	1226	Caenorhabditis remanei	CRE13720
2	1226	Caenorhabditis remanei	CRE16775
2	1226	Caenorhabditis remanei	CRE17751
2	1226	Caenorhabditis japonica	CJA27740
2	1226	Caenorhabditis briggsae	CBG18371	sip
2	1226	Caenorhabditis japonica	CJA23131
2	1226	Caenorhabditis remanei	CRE18323
2	1226	Caenorhabditis japonica	CJA27129
2	1226	Caenorhabditis japonica	CJA09279
2	1226	Caenorhabditis japonica	CJA24941
2	1226	Caenorhabditis japonica	CJA05430
2	1226	Caenorhabditis japonica	CJA24281
2	1226	Caenorhabditis remanei	CRE10404
2	1226	Caenorhabditis briggsae	CBG21660	hsp
2	1226	Caenorhabditis japonica	CJA10679
2	1226	Caenorhabditis brenneri	CBN30035
2	1226	Caenorhabditis remanei	CRE23115
2	1226	Caenorhabditis remanei	CRE05653	srx
2	1226	Caenorhabditis japonica	CJA08290
2	1226	Caenorhabditis japonica	CJA21273
2	1226	Caenorhabditis japonica	CJA21894
2	1226	Caenorhabditis japonica	CJA11133
2	1226	Caenorhabditis japonica	CJA02957	nol
2	1226	Caenorhabditis elegans	Y73B6A.6
2	1226	Caenorhabditis remanei	CRE16534
2	1226	Caenorhabditis remanei	CRE05162
2	1226	Caenorhabditis japonica	CJA19461
2	1226	Caenorhabditis remanei	CRE20101
2	1226	Caenorhabditis briggsae	CBG21093
2	1226	Caenorhabditis brenneri	CBN21368
2	1226	Caenorhabditis elegans	F38E11.1	hsp
2	1226	Caenorhabditis japonica	CJA24334
2	1226	Caenorhabditis japonica	CJA26647
2	1226	Caenorhabditis briggsae	CBG06402
2	1226	Caenorhabditis briggsae	CBG19155
2	1226	Caenorhabditis remanei	CRE18496
2	1226	Caenorhabditis elegans	ZK105.3
2	1226	Caenorhabditis japonica	CJA27972
2	1226	Caenorhabditis japonica	CJA24751
2	1226	Caenorhabditis japonica	CJA04976
2	1226	Caenorhabditis japonica	CJA10522	srx
2	1226	Caenorhabditis briggsae	CBG04607
2	1226	Caenorhabditis japonica	CJA03221
2	1226	Caenorhabditis japonica	CJA20219
2	1226	Caenorhabditis remanei	CRE08138
2	1226	Caenorhabditis remanei	CRE03495
2	1226	Caenorhabditis remanei	CRE15009
2	1226	Caenorhabditis japonica	CJA28573
2	1226	Caenorhabditis japonica	CJA21819
2	1226	Caenorhabditis japonica	CJA23218
2	1226	Caenorhabditis japonica	CJA23012
2	1226	Caenorhabditis remanei	CRE12395
2	1226	Caenorhabditis japonica	CJA28280
2	1226	Caenorhabditis elegans	T27E4.8	hsp
2	1226	Caenorhabditis japonica	CJA19950
2	1226	Caenorhabditis remanei	CRE16520
2	1226	Caenorhabditis japonica	CJA26286
2	1226	Caenorhabditis japonica	CJA13134
2	1226	Caenorhabditis japonica	CJA22270
2	1226	Caenorhabditis japonica	CJA13918
2	1226	Caenorhabditis japonica	CJA04306
2	1226	Caenorhabditis remanei	CRE00201	hsp
2	1226	Caenorhabditis japonica	CJA25577
2	1226	Caenorhabditis japonica	CJA19917
2	1226	Caenorhabditis remanei	CRE17668
2	1226	Caenorhabditis japonica	CJA24689
2	1226	Caenorhabditis remanei	CRE19585
2	1226	Caenorhabditis japonica	CJA19734
2	1226	Caenorhabditis remanei	CRE12394
2	1226	Caenorhabditis japonica	CJA21070
2	1226	Caenorhabditis remanei	CRE19850
2	1226	Caenorhabditis brenneri	CBN24316
2	1226	Caenorhabditis japonica	CJA25685
2	1226	Caenorhabditis japonica	CJA06693
2	1226	Caenorhabditis remanei	CRE30244
2	1226	Caenorhabditis japonica	CJA01426
2	1226	Caenorhabditis japonica	CJA23081
2	1226	Caenorhabditis remanei	CRE30255
2	1226	Caenorhabditis japonica	CJA00006
2	1226	Caenorhabditis japonica	CJA03474
2	1226	Caenorhabditis remanei	CRE26190
2	1226	Caenorhabditis remanei	CRE02563
2	1226	Caenorhabditis japonica	CJA27990
2	1226	Caenorhabditis remanei	CRE15243
2	1226	Caenorhabditis remanei	CRE03437
2	1226	Caenorhabditis remanei	CRE01421
2	1226	Caenorhabditis elegans	Y47D3A.14
2	1226	Caenorhabditis japonica	CJA27086
2	1226	Caenorhabditis japonica	CJA07129
2	1226	Caenorhabditis japonica	CJA26578
2	1226	Caenorhabditis japonica	CJA25221
2	1226	Caenorhabditis japonica	CJA00739
2	1226	Caenorhabditis japonica	CJA26014
2	1226	Caenorhabditis japonica	CJA13658
2	1226	Caenorhabditis remanei	CRE12599
2	1226	Caenorhabditis remanei	CRE18847
2	1226	Caenorhabditis japonica	CJA28055
2	1226	Caenorhabditis remanei	CRE13751
2	1226	Caenorhabditis remanei	CRE06079
2	1226	Caenorhabditis remanei	CRE10655
2	1226	Caenorhabditis remanei	CRE17963
2	1226	Caenorhabditis remanei	CRE11543
2	1226	Caenorhabditis japonica	CJA01025
2	1226	Caenorhabditis japonica	CJA25517
2	1226	Caenorhabditis remanei	CRE31304
2	1226	Caenorhabditis japonica	CJA26758
2	1226	Caenorhabditis briggsae	CBG15084
2	1226	Caenorhabditis japonica	CJA17527
2	1226	Caenorhabditis remanei	CRE29224
2	1226	Caenorhabditis remanei	CRE09928
2	1226	Caenorhabditis japonica	CJA23873
2	1226	Caenorhabditis japonica	CJA21535
2	1226	Caenorhabditis remanei	CRE07630
2	1226	Caenorhabditis briggsae	CBG08123
2	1226	Caenorhabditis japonica	CJA28073
2	1226	Caenorhabditis japonica	CJA17697	hsp
2	1226	Caenorhabditis japonica	CJA11933
2	1226	Caenorhabditis japonica	CJA21089
2	1226	Caenorhabditis remanei	CRE14885
2	1226	Caenorhabditis briggsae	CBG19187
2	1226	Caenorhabditis elegans	Y55F3BR.6
2	1226	Caenorhabditis japonica	CJA11974
2	1226	Caenorhabditis japonica	CJA00936
2	1226	Caenorhabditis briggsae	CBG04608
2	1226	Caenorhabditis japonica	CJA06427
2	1226	Caenorhabditis japonica	CJA22357
2	1226	Caenorhabditis remanei	CRE21624
2	1226	Caenorhabditis elegans	Y110A7A.16
2	1226	Caenorhabditis remanei	CRE25957
2	1226	Caenorhabditis japonica	CJA08219
2	1226	Caenorhabditis japonica	CJA27970
2	1226	Caenorhabditis remanei	CRE19333
2	1226	Caenorhabditis remanei	CRE01166
2	1226	Caenorhabditis japonica	CJA26282
2	1226	Caenorhabditis japonica	CJA10575
2	1226	Caenorhabditis japonica	CJA22096
2	1226	Caenorhabditis japonica	CJA19638
2	1226	Caenorhabditis brenneri	CBN00789
2	1226	Caenorhabditis japonica	CJA25235
2	1226	Caenorhabditis japonica	CJA26804
2	1226	Caenorhabditis japonica	CJA08979
2	1226	Caenorhabditis japonica	CJA23457
2	1226	Caenorhabditis japonica	CJA23279
2	1226	Caenorhabditis japonica	CJA25552
2	1226	Caenorhabditis japonica	CJA15928
2	1226	Caenorhabditis japonica	CJA24505
2	1226	Caenorhabditis elegans	C14B9.1	hsp
2	1226	Caenorhabditis remanei	CRE01357	hsp
2	1226	Caenorhabditis brenneri	CBN31153
2	1226	Caenorhabditis japonica	CJA12251
2	1226	Caenorhabditis remanei	CRE18686
2	1226	Caenorhabditis japonica	CJA27613
2	1226	Caenorhabditis elegans	K09H9.4
2	1226	Caenorhabditis japonica	CJA09966
2	1226	Caenorhabditis japonica	CJA16856
2	1226	Caenorhabditis japonica	CJA29031
2	1226	Caenorhabditis japonica	CJA19781
2	1226	Caenorhabditis brenneri	CBN11543
2	1226	Caenorhabditis briggsae	CBG21659	hsp
2	1226	Caenorhabditis remanei	CRE07865
2	1226	Caenorhabditis remanei	CRE19382
2	1226	Caenorhabditis japonica	CJA28865
2	1226	Caenorhabditis japonica	CJA02718
2	1226	Caenorhabditis japonica	CJA19788
2	1226	Caenorhabditis remanei	CRE15852
2	1226	Caenorhabditis remanei	CRE27705
2	1226	Caenorhabditis brenneri	CBN13503
2	1226	Caenorhabditis japonica	CJA24872
2	1226	Caenorhabditis remanei	CRE12931
2	1226	Caenorhabditis remanei	CRE15119
2	1226	Caenorhabditis japonica	CJA29309
2	1226	Caenorhabditis japonica	CJA20907
2	1226	Caenorhabditis remanei	CRE13081
2	1226	Caenorhabditis japonica	CJA20948
2	1226	Caenorhabditis elegans	C09B8.6A	hsp
2	1226	Caenorhabditis japonica	CJA03322
2	1226	Caenorhabditis remanei	CRE07903
2	1226	Caenorhabditis remanei	CRE16256
2	1226	Caenorhabditis brenneri	CBN03353
2	1226	Caenorhabditis japonica	CJA05146
2	1226	Caenorhabditis japonica	CJA21094
2	1226	Caenorhabditis elegans	F02C9.2
2	1226	Caenorhabditis remanei	CRE03523
2	1226	Caenorhabditis briggsae	CBG24755
2	1226	Caenorhabditis briggsae	CBG26412
2	1226	Caenorhabditis japonica	CJA10669
2	1226	Caenorhabditis brenneri	CBN30708
2	1226	Caenorhabditis japonica	CJA22444
2	1226	Caenorhabditis remanei	CRE02509
2	1226	Caenorhabditis remanei	CRE19517
2	1226	Caenorhabditis elegans	R05D11.5
2	1226	Caenorhabditis japonica	CJA14537
2	1226	Caenorhabditis japonica	CJA12758
2	1226	Caenorhabditis japonica	CJA23273
2	1226	Caenorhabditis remanei	CRE15163
2	1226	Caenorhabditis remanei	CRE18319
2	1226	Caenorhabditis japonica	CJA19574
2	1226	Caenorhabditis japonica	CJA22688
2	1226	Caenorhabditis japonica	CJA07535
2	1226	Caenorhabditis remanei	CRE14179
2	1226	Caenorhabditis japonica	CJA06277
2	1226	Caenorhabditis japonica	CJA26756
2	1226	Caenorhabditis remanei	CRE29399
2	1226	Caenorhabditis elegans	T26G10.4
2	1226	Caenorhabditis briggsae	CBG17006
2	1226	Caenorhabditis remanei	CRE07748
2	1226	Caenorhabditis remanei	CRE23201	nol
2	1226	Caenorhabditis japonica	CJA29002
2	1226	Caenorhabditis remanei	CRE23252
2	1226	Caenorhabditis remanei	CRE27131
2	1226	Caenorhabditis briggsae	CBG25327
2	1226	Caenorhabditis remanei	CRE23222
2	1226	Caenorhabditis remanei	CRE14178
2	1226	Caenorhabditis elegans	C50B6.7
2	1226	Caenorhabditis remanei	CRE27617
2	1226	Caenorhabditis japonica	CJA23248
2	1226	Caenorhabditis japonica	CJA26196
2	1226	Caenorhabditis remanei	CRE26624
2	1226	Caenorhabditis remanei	CRE22920
2	1226	Caenorhabditis japonica	CJA23743
2	1226	Caenorhabditis japonica	CJA20642
2	1226	Caenorhabditis remanei	CRE10728
2	1226	Caenorhabditis remanei	CRE04257
2	1226	Caenorhabditis japonica	CJA28845
2	1226	Caenorhabditis brenneri	CBN02655
2	1226	Caenorhabditis remanei	CRE31196
2	1226	Caenorhabditis japonica	CJA24781
2	1226	Caenorhabditis japonica	CJA26932
2	1226	Caenorhabditis japonica	CJA23485
2	1226	Caenorhabditis japonica	CJA10466
2	1226	Caenorhabditis japonica	CJA25007
2	1226	Caenorhabditis japonica	CJA20016
2	1226	Caenorhabditis remanei	CRE12265
2	1226	Caenorhabditis remanei	CRE07537
2	1226	Caenorhabditis briggsae	CBG24105
2	1226	Caenorhabditis japonica	CJA05576
2	1226	Caenorhabditis remanei	CRE01042
2	1226	Caenorhabditis japonica	CJA28108
2	1226	Caenorhabditis japonica	CJA04571
2	1226	Caenorhabditis japonica	CJA14045	hsp
2	1226	Caenorhabditis remanei	CRE18063
2	1226	Caenorhabditis japonica	CJA26791
2	1226	Caenorhabditis brenneri	CBN04438	nol
2	1226	Caenorhabditis japonica	CJA27285
2	1226	Caenorhabditis japonica	CJA21796
2	1226	Caenorhabditis remanei	CRE13291
2	1226	Caenorhabditis remanei	CRE22714
2	1226	Caenorhabditis remanei	CRE01891
2	1226	Caenorhabditis remanei	CRE11413
2	1226	Caenorhabditis japonica	CJA21680
2	1226	Caenorhabditis briggsae	CBG13218
2	1226	Caenorhabditis remanei	CRE02033
2	1226	Caenorhabditis briggsae	CBG14043
2	1226	Caenorhabditis japonica	CJA21718
2	1226	Caenorhabditis japonica	CJA23738
2	1226	Caenorhabditis briggsae	CBG08187
2	1226	Caenorhabditis japonica	CJA28571
2	1226	Caenorhabditis remanei	CRE01485
2	1226	Caenorhabditis japonica	CJA23052
2	1226	Caenorhabditis elegans	T15B7.7
2	1226	Caenorhabditis remanei	CRE21451
2	1226	Caenorhabditis remanei	CRE12358
2	1226	Caenorhabditis japonica	CJA01252
2	1226	Caenorhabditis remanei	CRE25224
2	1226	Caenorhabditis remanei	CRE30314
2	1226	Caenorhabditis japonica	CJA12694
2	1226	Caenorhabditis japonica	CJA05110	elpc
2	1226	Caenorhabditis remanei	CRE11295
2	1226	Caenorhabditis japonica	CJA03258
2	1226	Caenorhabditis remanei	CRE06181
2	1226	Caenorhabditis japonica	CJA06308
2	1226	Caenorhabditis japonica	CJA27612
2	1226	Caenorhabditis brenneri	CBN11881
2	1226	Caenorhabditis japonica	CJA11226
2	1226	Caenorhabditis japonica	CJA04350
2	1226	Caenorhabditis japonica	CJA22168
2	1226	Caenorhabditis remanei	CRE28894
2	1226	Caenorhabditis japonica	CJA19860
2	1226	Caenorhabditis japonica	CJA26784
2	1226	Caenorhabditis japonica	CJA24469
2	1226	Caenorhabditis japonica	CJA16710
2	1226	Caenorhabditis brenneri	CBN24961
2	1226	Caenorhabditis japonica	CJA16059
2	1226	Caenorhabditis remanei	CRE19584
2	1226	Caenorhabditis japonica	CJA07073
2	1226	Caenorhabditis japonica	CJA25465
2	1226	Caenorhabditis japonica	CJA00221
2	1226	Caenorhabditis briggsae	CBG11272	hsp
2	1226	Caenorhabditis elegans	F08H9.3
2	1226	Caenorhabditis japonica	CJA21940
2	1226	Caenorhabditis japonica	CJA26532
2	1226	Caenorhabditis japonica	CJA21157
2	1226	Caenorhabditis elegans	C14C6.1	srx
2	1226	Caenorhabditis remanei	CRE03603
2	1226	Caenorhabditis remanei	CRE19507
2	1226	Caenorhabditis japonica	CJA24623
2	1226	Caenorhabditis japonica	CJA20028
2	1226	Caenorhabditis remanei	CRE07413
2	1226	Caenorhabditis elegans	W09C3.8
2	1226	Caenorhabditis elegans	Y45G12C.11
2	1226	Caenorhabditis japonica	CJA09287
2	1226	Caenorhabditis japonica	CJA00252
2	1226	Caenorhabditis briggsae	CBG03284
2	1226	Caenorhabditis elegans	F07G11.8	srx
2	1226	Caenorhabditis remanei	CRE14129
2	1226	Caenorhabditis elegans	F56A4.6
2	1226	Caenorhabditis japonica	CJA02594
2	1226	Caenorhabditis remanei	CRE15409
2	1226	Caenorhabditis japonica	CJA29043
2	1226	Caenorhabditis brenneri	CBN15511
2	1226	Caenorhabditis japonica	CJA28401
2	1226	Caenorhabditis japonica	CJA02463
2	1226	Caenorhabditis japonica	CJA28369
2	1226	Caenorhabditis remanei	CRE20896
2	1226	Caenorhabditis remanei	CRE19801
2	1226	Caenorhabditis remanei	CRE08487
2	1226	Caenorhabditis japonica	CJA21898
2	1226	Caenorhabditis japonica	CJA22627
2	1226	Caenorhabditis briggsae	CBG26978
2	1226	Caenorhabditis japonica	CJA27562
2	1226	Caenorhabditis japonica	CJA16694
2	1226	Caenorhabditis japonica	CJA09178
2	1226	Caenorhabditis remanei	CRE03846
2	1226	Caenorhabditis japonica	CJA21855
2	1226	Caenorhabditis japonica	CJA19584
2	1226	Caenorhabditis japonica	CJA10214
2	1226	Caenorhabditis remanei	CRE29166
2	1226	Caenorhabditis elegans	T14C1.2
2	1226	Caenorhabditis japonica	CJA18453
2	1226	Caenorhabditis japonica	CJA01936
2	1226	Caenorhabditis remanei	CRE15413
2	1226	Caenorhabditis remanei	CRE25952
2	1226	Caenorhabditis japonica	CJA02626
2	1226	Caenorhabditis remanei	CRE29483
2	1226	Caenorhabditis remanei	CRE18317
2	1226	Caenorhabditis japonica	CJA17215
2	1226	Caenorhabditis briggsae	CBG10369	srx
2	1226	Caenorhabditis remanei	CRE30695
2	1226	Caenorhabditis japonica	CJA12807
2	1226	Caenorhabditis japonica	CJA19469
2	1226	Caenorhabditis japonica	CJA24010
2	1226	Caenorhabditis japonica	CJA23834
2	1226	Caenorhabditis remanei	CRE13750
2	1226	Caenorhabditis remanei	CRE24339
2	1226	Caenorhabditis remanei	CRE04603	sip
2	1226	Caenorhabditis remanei	CRE16953
2	1226	Caenorhabditis briggsae	CBG06068
2	1226	Caenorhabditis japonica	CJA03742
2	1226	Caenorhabditis elegans	T27E4.3	hsp
2	1226	Caenorhabditis remanei	CRE17189
2	1226	Caenorhabditis japonica	CJA13218
2	1226	Caenorhabditis brenneri	CBN07243
2	1226	Caenorhabditis japonica	CJA12489
2	1226	Caenorhabditis japonica	CJA15921
2	1226	Caenorhabditis remanei	CRE19383
2	1226	Caenorhabditis japonica	CJA01594
2	1226	Caenorhabditis elegans	K09B11.2
2	1226	Caenorhabditis japonica	CJA19979
2	1226	Caenorhabditis briggsae	CBG11427	srx
2	1226	Caenorhabditis japonica	CJA05118
2	1226	Caenorhabditis japonica	CJA24605
2	1226	Caenorhabditis brenneri	CBN09935
2	1226	Caenorhabditis remanei	CRE15998
2	1226	Caenorhabditis japonica	CJA20644
2	1226	Caenorhabditis japonica	CJA08235
2	1226	Caenorhabditis brenneri	CBN12997
2	1226	Caenorhabditis japonica	CJA06537
2	1226	Caenorhabditis brenneri	CBN15833
2	1226	Caenorhabditis japonica	CJA21389
2	1226	Caenorhabditis remanei	CRE15137
2	1226	Caenorhabditis japonica	CJA14862
2	1226	Caenorhabditis brenneri	CBN14304
2	1226	Caenorhabditis elegans	F38E9.4
2	1226	Caenorhabditis japonica	CJA09217
2	1226	Caenorhabditis remanei	CRE10590
2	1226	Caenorhabditis japonica	CJA27173
2	1226	Caenorhabditis remanei	CRE00182	hsp
2	1226	Caenorhabditis japonica	CJA28181
2	1226	Caenorhabditis japonica	CJA14732	nurf
2	1226	Caenorhabditis remanei	CRE07941
2	1226	Caenorhabditis brenneri	CBN21850
2	1226	Caenorhabditis japonica	CJA23854
2	1226	Caenorhabditis briggsae	CBG10825	elpc
2	1226	Caenorhabditis remanei	CRE00008
2	1226	Caenorhabditis briggsae	CBG01769	nol
2	1226	Caenorhabditis remanei	CRE25719
2	1226	Caenorhabditis japonica	CJA28394
2	1226	Caenorhabditis japonica	CJA08430
2	1226	Caenorhabditis japonica	CJA00880
2	1226	Caenorhabditis briggsae	CBG21685
2	1226	Caenorhabditis brenneri	CBN30795
2	1226	Caenorhabditis remanei	CRE22999
2	1226	Caenorhabditis japonica	CJA28598
2	1226	Caenorhabditis japonica	CJA23417
2	1226	Caenorhabditis japonica	CJA14609
2	1226	Caenorhabditis remanei	CRE20026
2	1226	Caenorhabditis japonica	CJA27040
2	1226	Caenorhabditis brenneri	CBN17934
2	1226	Caenorhabditis japonica	CJA03803
2	1226	Caenorhabditis japonica	CJA25050
2	1226	Caenorhabditis japonica	CJA05542
2	1226	Caenorhabditis remanei	CRE17642
2	1226	Caenorhabditis japonica	CJA25970
2	1226	Caenorhabditis japonica	CJA14687
2	1226	Caenorhabditis japonica	CJA20568
2	1226	Caenorhabditis remanei	CRE26881
2	1226	Caenorhabditis japonica	CJA27315
2	1226	Caenorhabditis japonica	CJA15226
2	1226	Caenorhabditis japonica	CJA23865
2	1226	Caenorhabditis japonica	CJA20004
2	1226	Caenorhabditis japonica	CJA01639
2	1226	Caenorhabditis japonica	CJA21623
2	1226	Caenorhabditis remanei	CRE30585
2	1226	Caenorhabditis japonica	CJA08302
2	1226	Caenorhabditis remanei	CRE13748
2	1226	Caenorhabditis remanei	CRE06154
2	1226	Caenorhabditis japonica	CJA27831
2	1226	Caenorhabditis japonica	CJA29015
2	1226	Caenorhabditis japonica	CJA25369
2	1226	Caenorhabditis remanei	CRE26942
2	1226	Caenorhabditis japonica	CJA24340
2	1226	Caenorhabditis japonica	CJA05400
2	1226	Caenorhabditis japonica	CJA23374
2	1226	Caenorhabditis elegans	Y61A9LA.9
2	1226	Caenorhabditis japonica	CJA25636
2	1226	Caenorhabditis elegans	Y49C4A.5	srx
2	1226	Caenorhabditis japonica	CJA29106
2	1226	Caenorhabditis briggsae	CBG27389
2	1226	Caenorhabditis elegans	T15B7.10
2	1226	Caenorhabditis japonica	CJA14300
2	1226	Caenorhabditis remanei	CRE00758
2	1226	Caenorhabditis elegans	R03H4.2	srx
2	1226	Caenorhabditis briggsae	CBG08148
2	1226	Caenorhabditis japonica	CJA28312
2	1226	Caenorhabditis japonica	CJA23573
2	1226	Caenorhabditis japonica	CJA04433
2	1226	Caenorhabditis japonica	CJA11722
2	1226	Caenorhabditis japonica	CJA26999
2	1226	Caenorhabditis remanei	CRE06319
2	1226	Caenorhabditis japonica	CJA23269
2	1226	Caenorhabditis brenneri	CBN16878
2	1226	Caenorhabditis elegans	F56H6.9
2	1226	Caenorhabditis japonica	CJA19135
2	1226	Caenorhabditis japonica	CJA23667
2	1226	Caenorhabditis remanei	CRE10542
2	1226	Caenorhabditis remanei	CRE05728	hsp
2	1226	Caenorhabditis brenneri	CBN03113
2	1226	Caenorhabditis japonica	CJA11627
2	1226	Caenorhabditis japonica	CJA12183
2	1226	Caenorhabditis remanei	CRE03000
2	1226	Caenorhabditis japonica	CJA24836
2	1226	Caenorhabditis japonica	CJA25683
2	1226	Caenorhabditis japonica	CJA28106
2	1226	Caenorhabditis japonica	CJA23960
2	1226	Caenorhabditis japonica	CJA20129
2	1226	Caenorhabditis brenneri	CBN05441
2	1226	Caenorhabditis japonica	CJA26954
2	1226	Caenorhabditis japonica	CJA22216
2	1226	Caenorhabditis remanei	CRE17508
2	1226	Caenorhabditis remanei	CRE08674
2	1226	Caenorhabditis japonica	CJA28471
2	1226	Caenorhabditis remanei	CRE31249
2	1226	Caenorhabditis japonica	CJA23514
2	1226	Caenorhabditis brenneri	CBN10775
2	1226	Caenorhabditis japonica	CJA00718
2	1226	Caenorhabditis japonica	CJA04281
2	1226	Caenorhabditis brenneri	CBN02236
2	1226	Caenorhabditis brenneri	CBN00335
2	1226	Caenorhabditis japonica	CJA22315
2	1226	Caenorhabditis remanei	CRE27211
2	1226	Caenorhabditis briggsae	CBG15079
2	1226	Caenorhabditis remanei	CRE06320
2	1226	Caenorhabditis briggsae	CBG14817	hsp
2	1226	Caenorhabditis remanei	CRE17074
2	1226	Caenorhabditis japonica	CJA22648
2	1226	Caenorhabditis brenneri	CBN18502
2	1226	Caenorhabditis japonica	CJA22527
2	1226	Caenorhabditis japonica	CJA25957
2	1226	Caenorhabditis elegans	T15B7.17
2	1226	Caenorhabditis japonica	CJA19893
2	1226	Caenorhabditis japonica	CJA22944
2	1226	Caenorhabditis japonica	CJA23507
2	1226	Caenorhabditis japonica	CJA20303
2	1226	Caenorhabditis japonica	CJA03170
2	1226	Caenorhabditis japonica	CJA03001
2	1226	Caenorhabditis remanei	CRE23182
2	1226	Caenorhabditis remanei	CRE18315
2	1226	Caenorhabditis brenneri	CBN01149
2	1226	Caenorhabditis japonica	CJA20793
2	1226	Caenorhabditis japonica	CJA20857
2	1226	Caenorhabditis japonica	CJA25391
2	1226	Caenorhabditis japonica	CJA24963
2	1226	Caenorhabditis japonica	CJA20518
2	1226	Caenorhabditis japonica	CJA23356
2	1226	Caenorhabditis elegans	Y51F10.8
2	1226	Caenorhabditis remanei	CRE14091
2	1226	Caenorhabditis remanei	CRE02382
2	1226	Caenorhabditis japonica	CJA19677
2	1226	Caenorhabditis japonica	CJA24855
2	1226	Caenorhabditis briggsae	CBG25468
2	1226	Caenorhabditis japonica	CJA19029	srx
2	1226	Caenorhabditis japonica	CJA03732
2	1226	Caenorhabditis japonica	CJA13341
2	1226	Caenorhabditis japonica	CJA28131
2	1226	Caenorhabditis elegans	Y73B6BL.16
2	1226	Caenorhabditis japonica	CJA24948
2	1226	Caenorhabditis japonica	CJA22358
2	1226	Caenorhabditis japonica	CJA26835
2	1226	Caenorhabditis remanei	CRE25428	hsp
2	1226	Caenorhabditis remanei	CRE14138
2	1226	Caenorhabditis japonica	CJA16894
2	1226	Caenorhabditis brenneri	CBN11943
2	1226	Caenorhabditis japonica	CJA23504
2	1226	Caenorhabditis japonica	CJA05865
2	1226	Caenorhabditis japonica	CJA27723
2	1226	Caenorhabditis remanei	CRE18497
2	1226	Caenorhabditis japonica	CJA28886
2	1226	Caenorhabditis briggsae	CBG07518
2	1226	Caenorhabditis brenneri	CBN24535
2	1226	Caenorhabditis brenneri	CBN10234
2	1226	Caenorhabditis japonica	CJA24956
2	1226	Caenorhabditis brenneri	CBN31754
2	1226	Caenorhabditis japonica	CJA24465
2	1226	Caenorhabditis remanei	CRE26029
2	1226	Caenorhabditis remanei	CRE23116
2	1226	Caenorhabditis remanei	CRE26940
2	1226	Caenorhabditis japonica	CJA22013
2	1226	Caenorhabditis remanei	CRE08673
2	1226	Caenorhabditis remanei	CRE03407
2	1226	Caenorhabditis japonica	CJA02514
2	1226	Caenorhabditis remanei	CRE07749
2	1226	Caenorhabditis remanei	CRE31008
2	1226	Caenorhabditis japonica	CJA27600
2	1226	Caenorhabditis remanei	CRE19335
2	1226	Caenorhabditis japonica	CJA19611
2	1226	Caenorhabditis remanei	CRE18322
2	1226	Caenorhabditis remanei	CRE21642
2	1226	Caenorhabditis remanei	CRE31440
2	1226	Caenorhabditis remanei	CRE27162
2	1226	Caenorhabditis remanei	CRE10695
2	1226	Caenorhabditis japonica	CJA28104
2	1226	Caenorhabditis japonica	CJA05145
2	1226	Caenorhabditis remanei	CRE15766
2	1226	Caenorhabditis japonica	CJA22669
2	1226	Caenorhabditis japonica	CJA23471
2	1226	Caenorhabditis japonica	CJA13150
2	1226	Caenorhabditis remanei	CRE05102
2	1226	Caenorhabditis brenneri	CBN25474
2	1226	Caenorhabditis remanei	CRE29602	hsp
2	1226	Caenorhabditis japonica	CJA21584
2	1226	Caenorhabditis remanei	CRE09940
2	1226	Caenorhabditis briggsae	CBG19154
2	1226	Caenorhabditis japonica	CJA06936
2	1226	Caenorhabditis brenneri	CBN29695
2	1226	Caenorhabditis briggsae	CBG08501
2	1226	Caenorhabditis japonica	CJA26115
2	1226	Caenorhabditis japonica	CJA26936
2	1226	Caenorhabditis japonica	CJA07835
2	1226	Caenorhabditis remanei	CRE06474
2	1226	Caenorhabditis remanei	CRE17640
2	1226	Caenorhabditis remanei	CRE19068
2	1226	Caenorhabditis briggsae	CBG19156	srx
2	1226	Caenorhabditis remanei	CRE03330
2	1226	Caenorhabditis brenneri	CBN31887
2	1226	Caenorhabditis remanei	CRE25525
2	1226	Caenorhabditis remanei	CRE16934
2	1226	Caenorhabditis brenneri	CBN01924
2	1226	Caenorhabditis japonica	CJA01925
2	1226	Caenorhabditis japonica	CJA15930
2	1226	Caenorhabditis japonica	CJA13072
2	1226	Caenorhabditis remanei	CRE13755
2	1226	Caenorhabditis brenneri	CBN21892
2	1226	Caenorhabditis remanei	CRE22067
2	1226	Caenorhabditis japonica	CJA28952
2	1226	Caenorhabditis briggsae	CBG04606
2	1226	Caenorhabditis japonica	CJA22989
2	1226	Caenorhabditis remanei	CRE03522
2	1226	Caenorhabditis brenneri	CBN18379	hsp
2	1226	Caenorhabditis japonica	CJA23539
2	1226	Caenorhabditis japonica	CJA22866
2	1226	Caenorhabditis japonica	CJA11181
2	1226	Caenorhabditis japonica	CJA20218
2	1226	Caenorhabditis remanei	CRE19107
2	1226	Caenorhabditis japonica	CJA27873
2	1226	Caenorhabditis remanei	CRE01598
2	1226	Caenorhabditis japonica	CJA25389
2	1226	Caenorhabditis japonica	CJA25101
2	1226	Caenorhabditis elegans	R10D12.4	srx
2	1226	Caenorhabditis remanei	CRE02798
2	1226	Caenorhabditis remanei	CRE27748
2	1226	Caenorhabditis remanei	CRE11068
2	1226	Caenorhabditis japonica	CJA01187
2	1226	Caenorhabditis japonica	CJA14662
2	1226	Caenorhabditis elegans	T27E4.9	hsp
2	1226	Caenorhabditis remanei	CRE13013
2	1226	Caenorhabditis elegans	F56H6.7
2	1226	Caenorhabditis japonica	CJA00423
2	1226	Caenorhabditis elegans	F43D9.4	sip
2	1226	Caenorhabditis japonica	CJA24021
2	1226	Caenorhabditis remanei	CRE06213
2	1226	Caenorhabditis japonica	CJA14952
2	1226	Caenorhabditis japonica	CJA19042
2	1226	Caenorhabditis remanei	CRE12593
2	1226	Caenorhabditis briggsae	CBG02254
2	1226	Caenorhabditis japonica	CJA20977
2	1226	Caenorhabditis remanei	CRE02883
2	1226	Caenorhabditis japonica	CJA25199
2	1226	Caenorhabditis japonica	CJA27620
2	1226	Caenorhabditis japonica	CJA26831
2	1226	Caenorhabditis brenneri	CBN04423
2	1226	Caenorhabditis remanei	CRE20473
2	1226	Caenorhabditis japonica	CJA11333
2	1226	Caenorhabditis briggsae	CBG27388
2	1226	Caenorhabditis remanei	CRE17033
2	1226	Caenorhabditis japonica	CJA09823
2	1226	Caenorhabditis remanei	CRE20150
2	1226	Caenorhabditis remanei	CRE26034
2	1226	Caenorhabditis remanei	CRE19586
2	1226	Caenorhabditis japonica	CJA11009
2	1226	Caenorhabditis japonica	CJA14462
2	1226	Caenorhabditis japonica	CJA26094
2	1226	Caenorhabditis remanei	CRE19791
2	1226	Caenorhabditis japonica	CJA21697
2	1226	Caenorhabditis japonica	CJA00621
2	1226	Caenorhabditis japonica	CJA24986
2	1226	Caenorhabditis japonica	CJA20998
2	1226	Caenorhabditis remanei	CRE20586
2	1226	Caenorhabditis japonica	CJA26304
2	1226	Caenorhabditis japonica	CJA06440
2	1226	Caenorhabditis remanei	CRE07070
2	1226	Caenorhabditis japonica	CJA21133
2	1226	Caenorhabditis remanei	CRE17017
2	1226	Caenorhabditis japonica	CJA05602
2	1226	Caenorhabditis japonica	CJA27073
2	1226	Caenorhabditis japonica	CJA26469
2	1226	Caenorhabditis remanei	CRE13806
2	1226	Caenorhabditis japonica	CJA23326
2	1226	Caenorhabditis remanei	CRE03358
2	1226	Caenorhabditis brenneri	CBN19348
2	1226	Caenorhabditis japonica	CJA24056
2	1226	Caenorhabditis japonica	CJA22608
2	1226	Caenorhabditis remanei	CRE29146
2	1226	Caenorhabditis briggsae	CBG19184
2	1226	Caenorhabditis remanei	CRE23172
2	1226	Caenorhabditis japonica	CJA27532
2	1226	Caenorhabditis japonica	CJA18902
2	1226	Caenorhabditis japonica	CJA25154
2	1226	Caenorhabditis brenneri	CBN29347
2	1226	Caenorhabditis japonica	CJA09202
2	1226	Caenorhabditis japonica	CJA00735
2	1226	Caenorhabditis japonica	CJA24715
2	1226	Caenorhabditis elegans	T08B2.3
2	1226	Caenorhabditis brenneri	CBN04567
2	1226	Caenorhabditis remanei	CRE00389
2	1226	Caenorhabditis japonica	CJA22736
2	1226	Caenorhabditis japonica	CJA24391
2	1226	Caenorhabditis remanei	CRE14882
2	1226	Caenorhabditis remanei	CRE27471
2	1226	Caenorhabditis remanei	CRE01640
2	1226	Caenorhabditis japonica	CJA25585
2	1226	Caenorhabditis elegans	R13D7.6	srx
2	1226	Caenorhabditis briggsae	CBG00949
2	1226	Caenorhabditis brenneri	CBN13496
2	1226	Caenorhabditis remanei	CRE23625
2	1226	Caenorhabditis japonica	CJA23497
2	1226	Caenorhabditis japonica	CJA28076
2	1226	Caenorhabditis remanei	CRE09570
2	1226	Caenorhabditis japonica	CJA24126
2	1226	Caenorhabditis japonica	CJA23728
2	1226	Caenorhabditis japonica	CJA21011
2	1226	Caenorhabditis brenneri	CBN19638
2	1226	Caenorhabditis briggsae	CBG04592
2	1226	Caenorhabditis remanei	CRE14884
2	1226	Caenorhabditis brenneri	CBN01299
2	1226	Caenorhabditis remanei	CRE17639
2	1226	Caenorhabditis briggsae	CBG19158
2	1226	Caenorhabditis japonica	CJA29100
2	1226	Caenorhabditis brenneri	CBN12489
2	1226	Caenorhabditis japonica	CJA29134
2	1226	Caenorhabditis japonica	CJA08755	tin
2	1226	Caenorhabditis japonica	CJA21029
2	1226	Caenorhabditis remanei	CRE01356	hsp
2	1226	Caenorhabditis japonica	CJA18100
2	1226	Caenorhabditis briggsae	CBG01420
2	1226	Caenorhabditis remanei	CRE23006
2	1226	Caenorhabditis japonica	CJA04877
2	1226	Caenorhabditis japonica	CJA07066
2	1226	Caenorhabditis elegans	Y46H3A.2	hsp
2	1226	Caenorhabditis remanei	CRE17112
2	1226	Caenorhabditis japonica	CJA00699
2	1226	Caenorhabditis remanei	CRE05084
2	1226	Caenorhabditis japonica	CJA24867
2	1226	Caenorhabditis japonica	CJA13612	sip
2	1226	Caenorhabditis japonica	CJA22134
2	1226	Caenorhabditis remanei	CRE08823
2	1226	Caenorhabditis japonica	CJA29303
2	1226	Caenorhabditis elegans	B0035.1B
2	1226	Caenorhabditis japonica	CJA24883
2	1226	Caenorhabditis japonica	CJA20787
2	1226	Caenorhabditis japonica	CJA27407
2	1226	Caenorhabditis remanei	CRE26667
2	1226	Caenorhabditis japonica	CJA09435
2	1226	Caenorhabditis japonica	CJA28806
2	1226	Caenorhabditis remanei	CRE19384
2	1226	Caenorhabditis remanei	CRE12969
2	1226	Caenorhabditis japonica	CJA20525
2	1226	Caenorhabditis brenneri	CBN08507	hsp
2	1226	Caenorhabditis japonica	CJA05087
2	1226	Caenorhabditis japonica	CJA02944
2	1226	Caenorhabditis japonica	CJA29332
2	1226	Caenorhabditis japonica	CJA27245
2	1226	Caenorhabditis remanei	CRE14464
2	1226	Caenorhabditis japonica	CJA00278
2	1226	Caenorhabditis japonica	CJA02027
2	1226	Caenorhabditis elegans	F52E1.7A	hsp
2	1226	Caenorhabditis remanei	CRE11160
2	1226	Caenorhabditis japonica	CJA19719
2	1226	Caenorhabditis japonica	CJA22814
2	1226	Caenorhabditis remanei	CRE13754
2	1226	Caenorhabditis remanei	CRE06218
2	1226	Caenorhabditis briggsae	CBG07503
2	1226	Caenorhabditis japonica	CJA23354
2	1226	Caenorhabditis japonica	CJA02327
2	1226	Caenorhabditis japonica	CJA27949
2	1226	Caenorhabditis japonica	CJA08997
2	1226	Caenorhabditis japonica	CJA23002
2	1226	Caenorhabditis remanei	CRE12396
2	1226	Caenorhabditis japonica	CJA11785
2	1226	Caenorhabditis brenneri	CBN12952
2	1226	Caenorhabditis briggsae	CBG08968
2	1226	Caenorhabditis remanei	CRE10403
2	1226	Caenorhabditis elegans	ZK1128.7
2	1226	Caenorhabditis japonica	CJA14442
2	1226	Caenorhabditis japonica	CJA28538
2	1226	Caenorhabditis brenneri	CBN10154
2	1226	Caenorhabditis japonica	CJA24033
2	1226	Caenorhabditis japonica	CJA28642
2	1226	Caenorhabditis japonica	CJA22067	hsp
2	1226	Caenorhabditis japonica	CJA06869
2	1226	Caenorhabditis remanei	CRE08559
2	1226	Caenorhabditis japonica	CJA17421
2	1226	Caenorhabditis japonica	CJA21532
2	1226	Caenorhabditis japonica	CJA12199
2	1226	Caenorhabditis remanei	CRE00391
2	1226	Caenorhabditis japonica	CJA27203
2	1226	Caenorhabditis brenneri	CBN06627
2	1226	Caenorhabditis briggsae	CBG26850
2	1226	Caenorhabditis japonica	CJA00243
2	1226	Caenorhabditis brenneri	CBN23029
2	1226	Caenorhabditis elegans	F59E11.1	srx
2	1226	Caenorhabditis japonica	CJA16301
2	1226	Caenorhabditis japonica	CJA06779
2	1226	Caenorhabditis remanei	CRE15244
2	1226	Caenorhabditis japonica	CJA20680
2	1226	Caenorhabditis japonica	CJA02710
2	1226	Caenorhabditis remanei	CRE27542
2	1226	Caenorhabditis remanei	CRE03494
2	1226	Caenorhabditis japonica	CJA27952
2	1226	Caenorhabditis briggsae	CBG12511
2	1226	Caenorhabditis elegans	K03F8.1
2	1226	Caenorhabditis elegans	C14F11.5	hsp
2	1226	Caenorhabditis remanei	CRE08671
2	1226	Caenorhabditis briggsae	CBG10693
2	1226	Caenorhabditis japonica	CJA01106
2	1226	Caenorhabditis japonica	CJA15059	hsp
2	1226	Caenorhabditis remanei	CRE27877
2	1226	Caenorhabditis japonica	CJA21519
2	1226	Caenorhabditis brenneri	CBN17288
2	1226	Caenorhabditis elegans	F46F5.11
2	1226	Caenorhabditis remanei	CRE02562
2	1226	Caenorhabditis japonica	CJA23098
2	1226	Caenorhabditis japonica	CJA22705
2	1226	Caenorhabditis brenneri	CBN03561
2	1226	Caenorhabditis remanei	CRE16479
2	1226	Caenorhabditis remanei	CRE11542
2	1226	Caenorhabditis elegans	T15B7.6
2	1226	Caenorhabditis japonica	CJA21767
2	1226	Caenorhabditis remanei	CRE17442
2	1226	Caenorhabditis japonica	CJA21333
2	1226	Caenorhabditis remanei	CRE26021
2	1226	Caenorhabditis briggsae	CBG19862
2	1226	Caenorhabditis japonica	CJA26122
[truncated: 6,135 more rows]
